# Supplementary material for: Metal-free one-pot synthesis of 1,3-diazaheterocyclic compounds via I2-mediated oxidative C–N bond formation
Source: Royal Society of Chemistry journal article supplement (doi:10.1039/c5ra11262a), 2015-01-01

## Supporting Information

### **Metal-Free One-Pot Synthesis of 1,3-Diazaheterocyclic Compounds via I<sub>2</sub>-Mediated Oxidative C–N Bond Formation**

Xianhai Tian,<sup>1</sup> Lina Song,<sup>1</sup> Ertong Li,<sup>1</sup> Qiang Wang,<sup>2</sup> Wenquan Yu,<sup>\*1</sup> and Junbiao Chang<sup>\*1,3</sup>

<sup>1</sup>*College of Chemistry and Molecular Engineering, Zhengzhou University, Zhengzhou, Henan Province 450001,  
PR China*

<sup>2</sup>*High and New Technology Research Center of Henan Academy of Sciences, Zhengzhou, Henan Province 450002,  
PR China*

<sup>3</sup>*Collaborative Innovation Center of New Drug Research and Safety Evaluation, Henan Province, Zhengzhou  
450001, PR China*

Email: changjunbiao@zzu.edu.cn (J.C.); wenquan\_yu@zzu.edu.cn (W.Y.)

#### **CONTENTS:**

1. <sup>1</sup>H NMR and <sup>13</sup>C NMR spectra of compounds **1–4** S2

# 1. $^1\text{H}$ NMR and $^{13}\text{C}$ NMR spectra of compounds 1–4

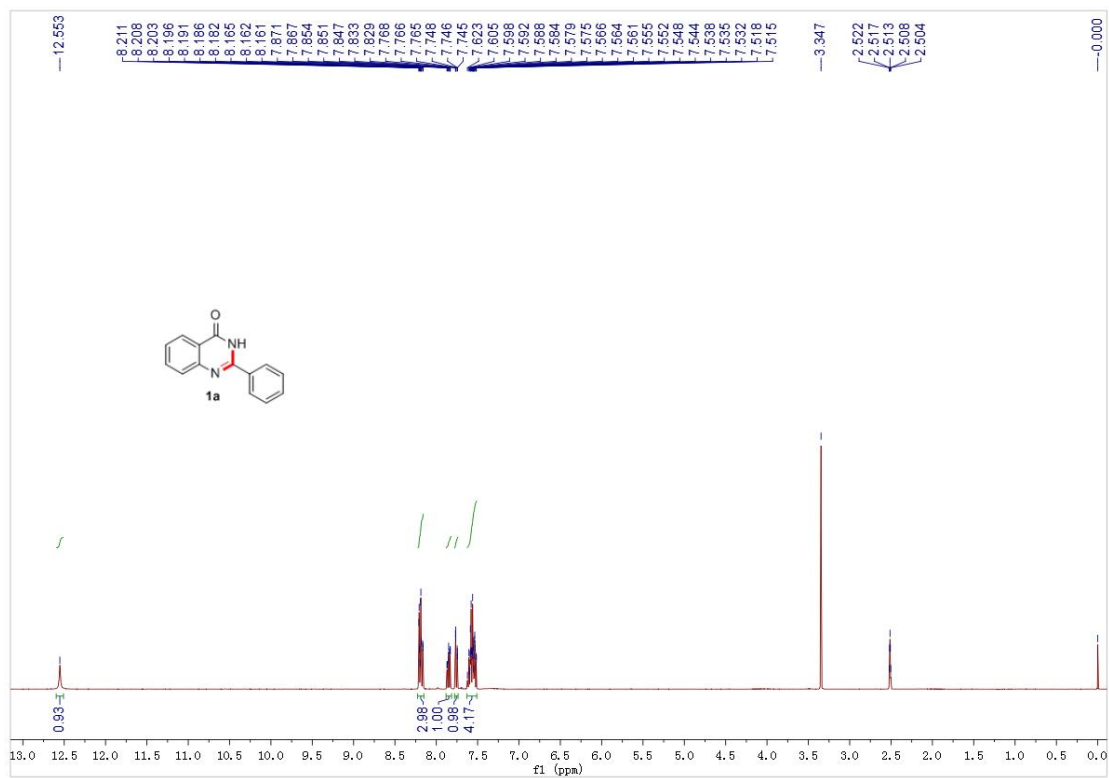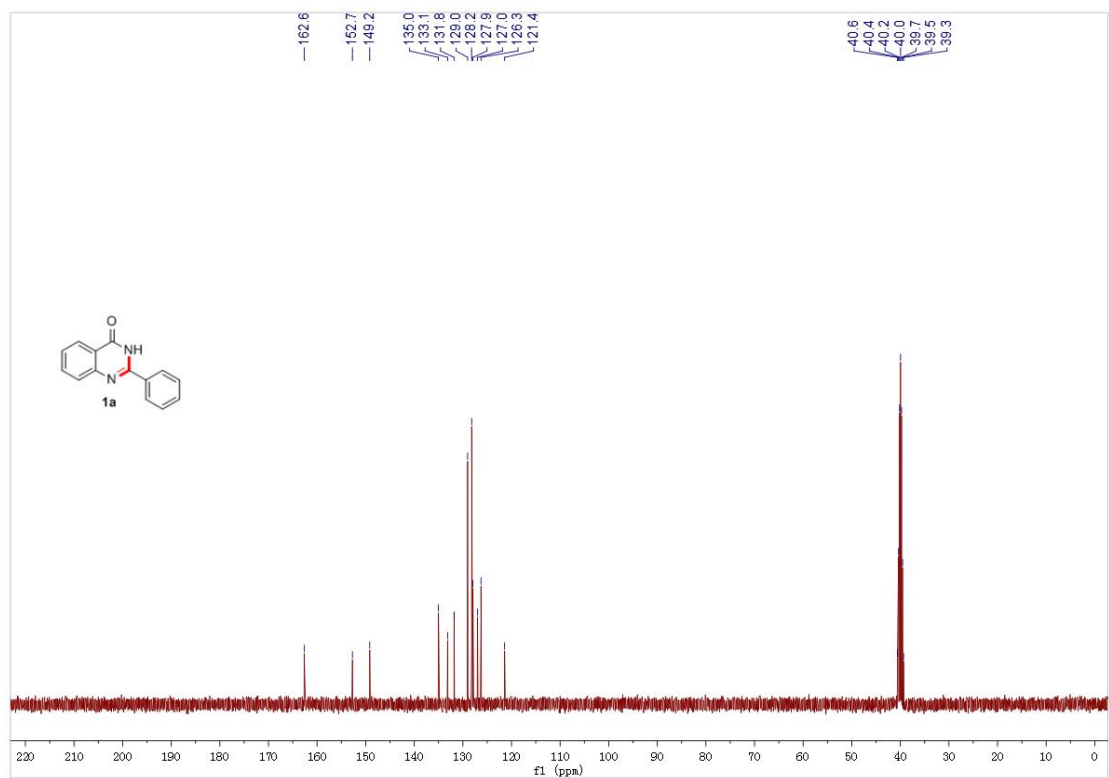

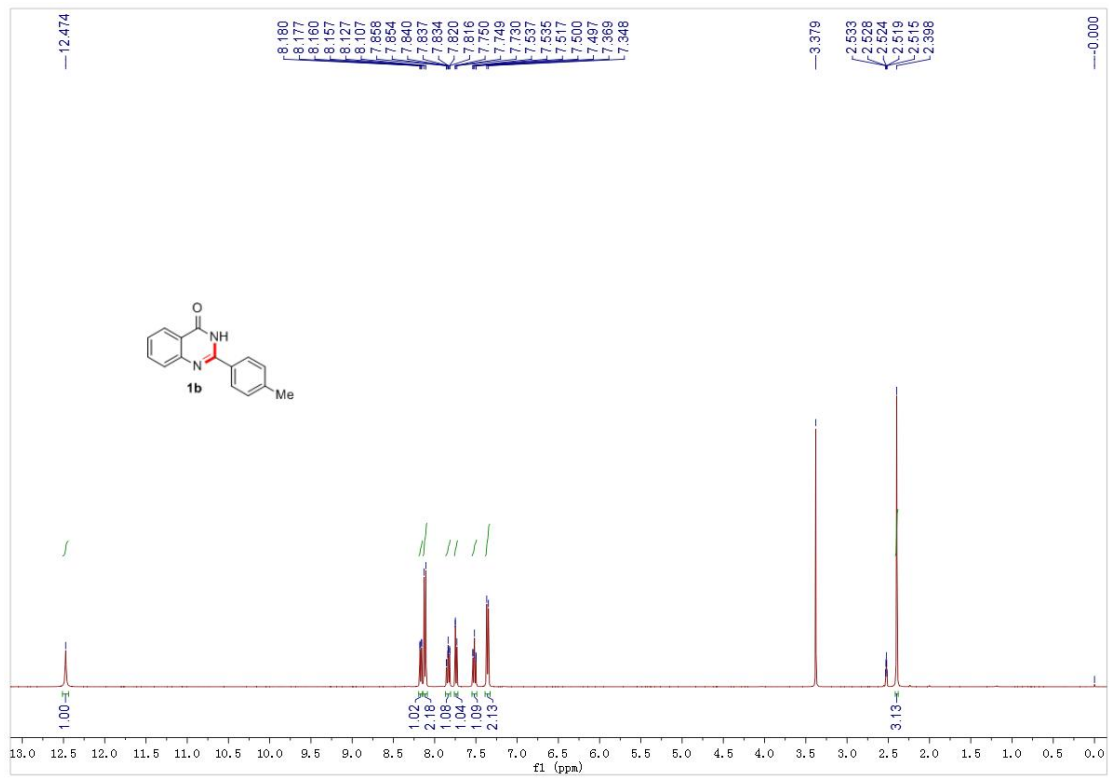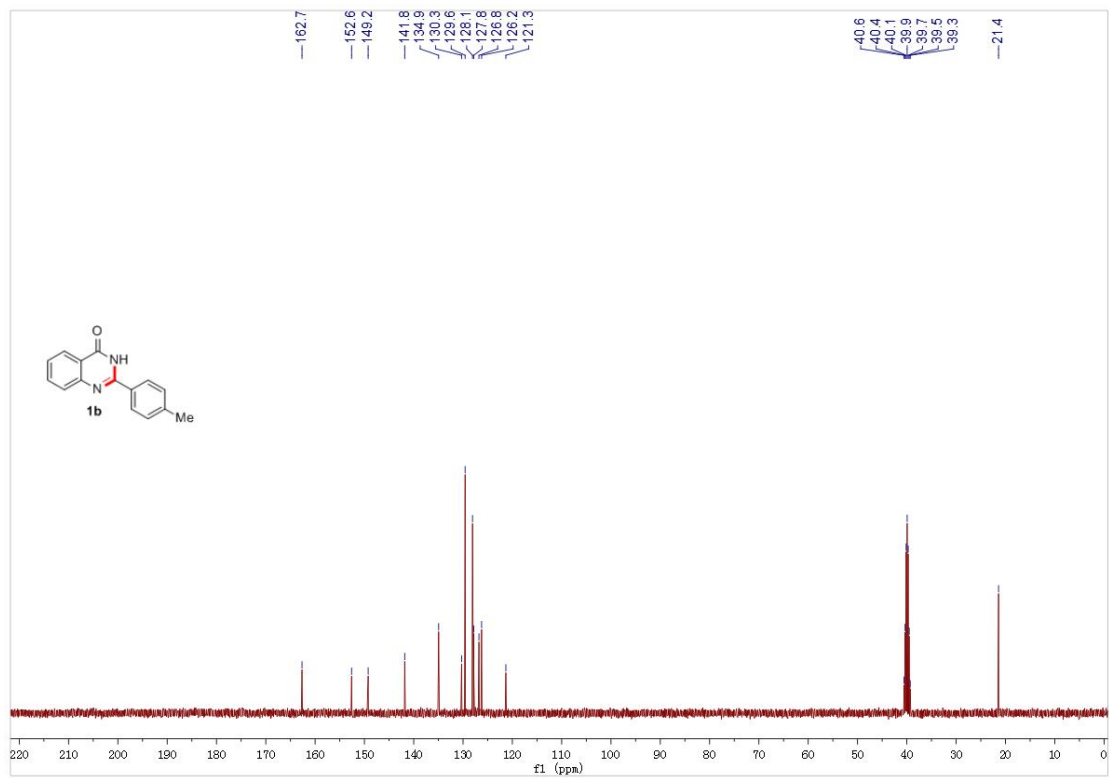

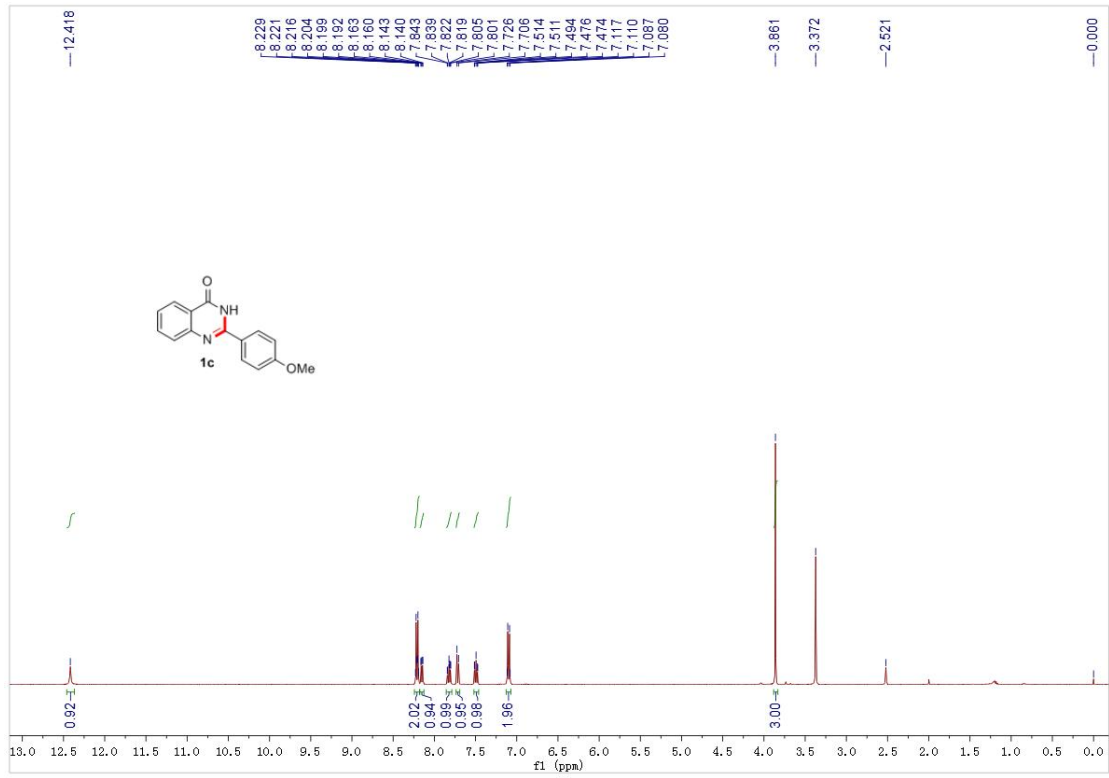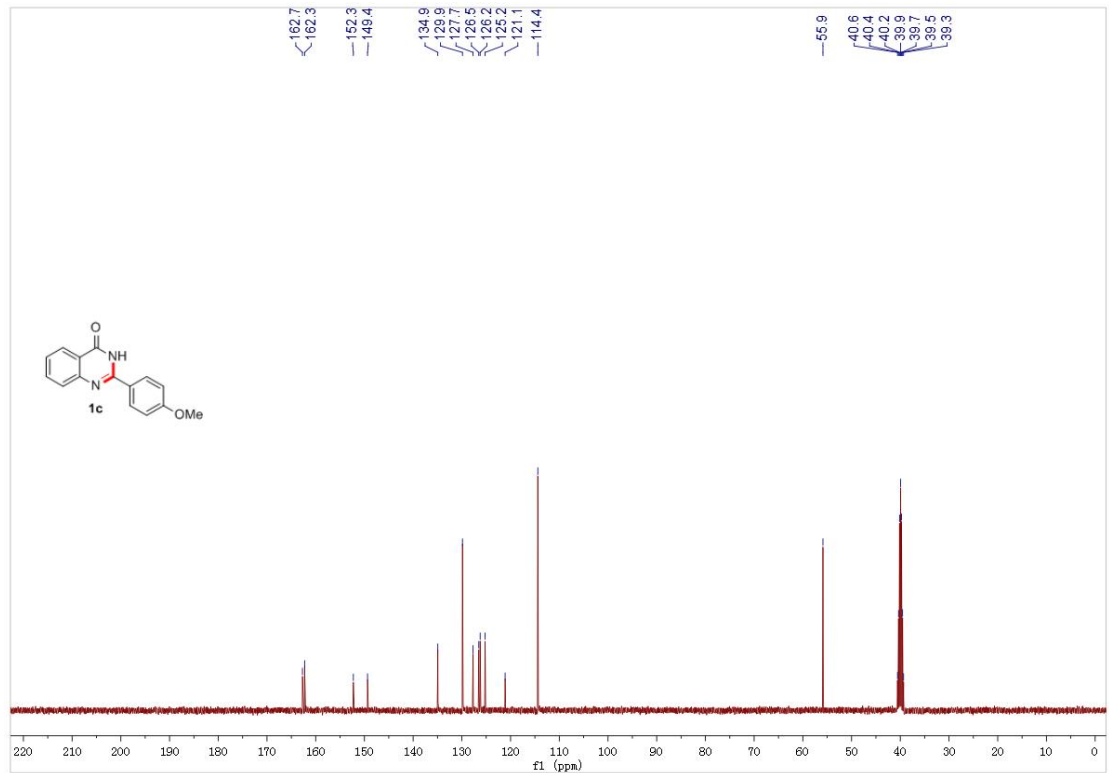

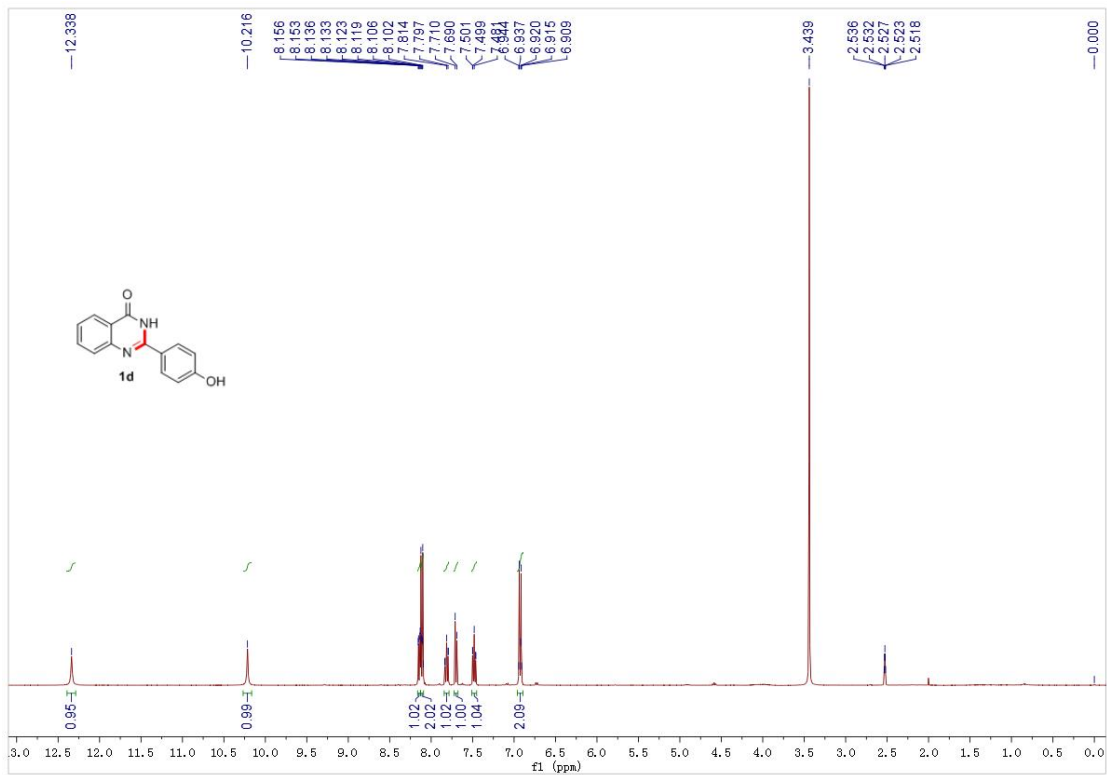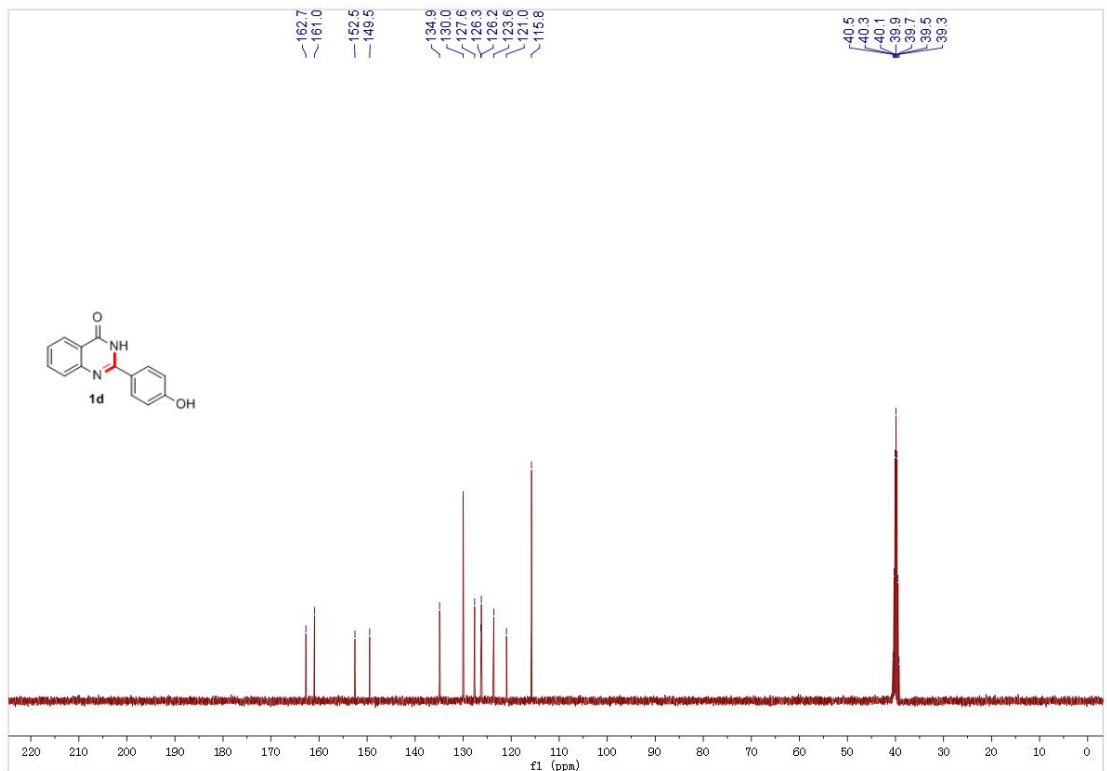

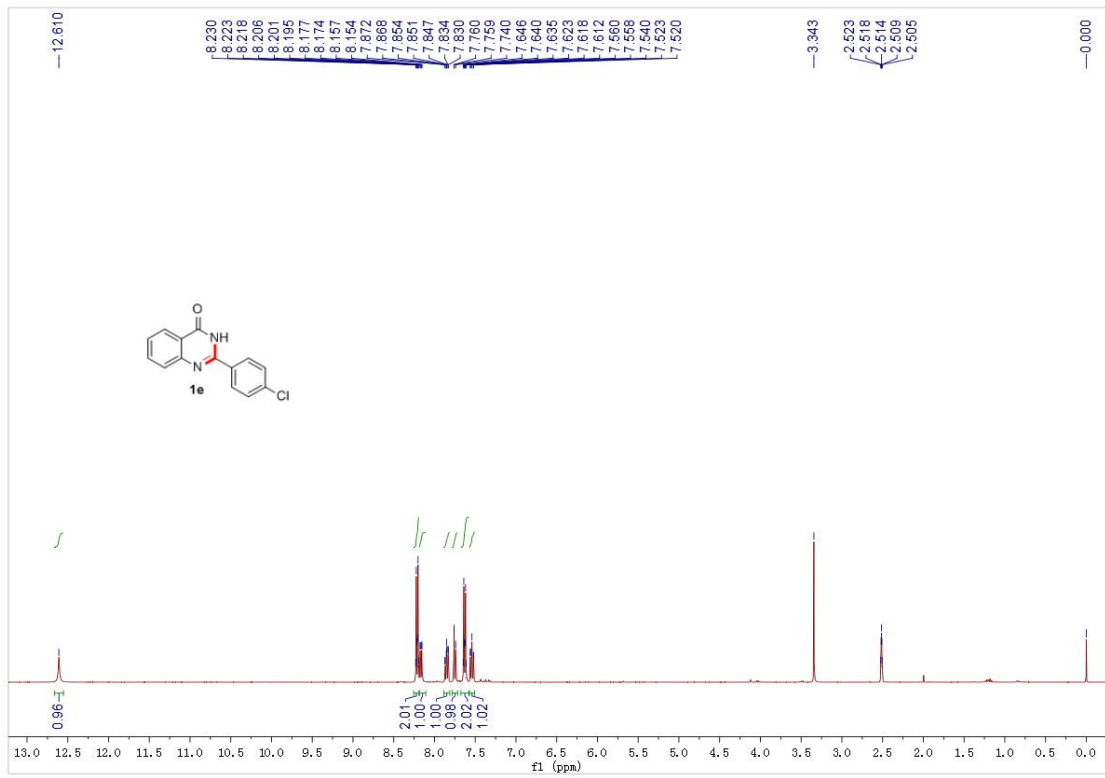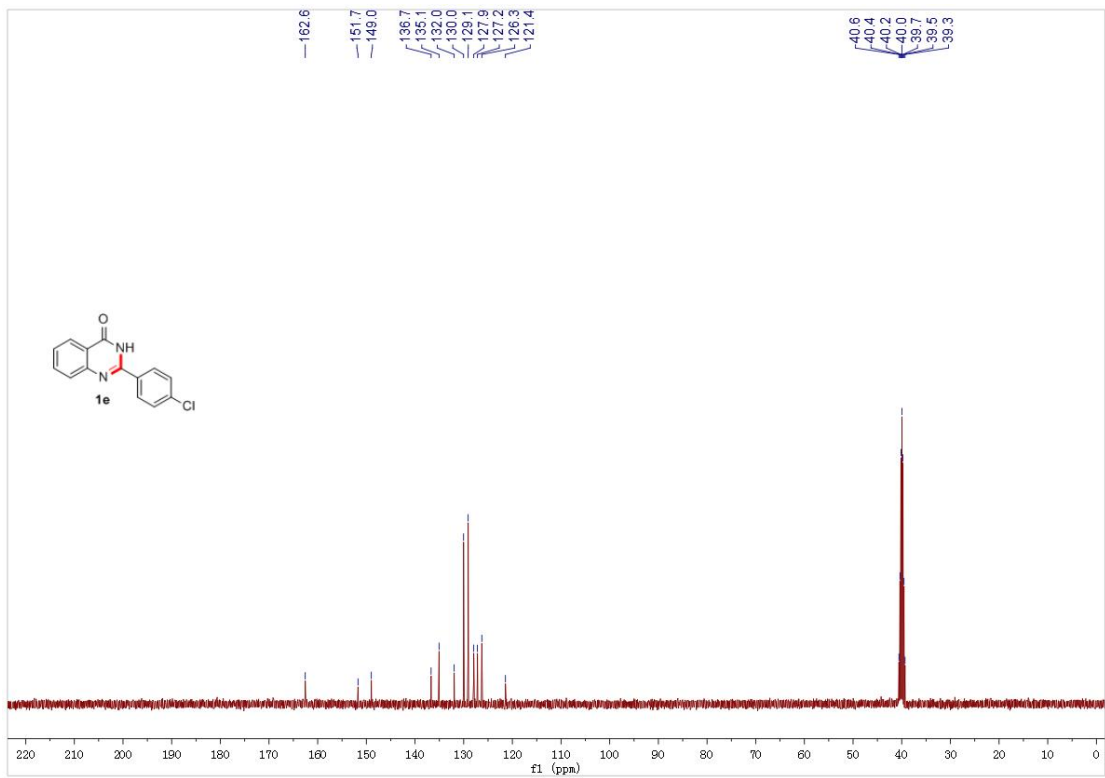

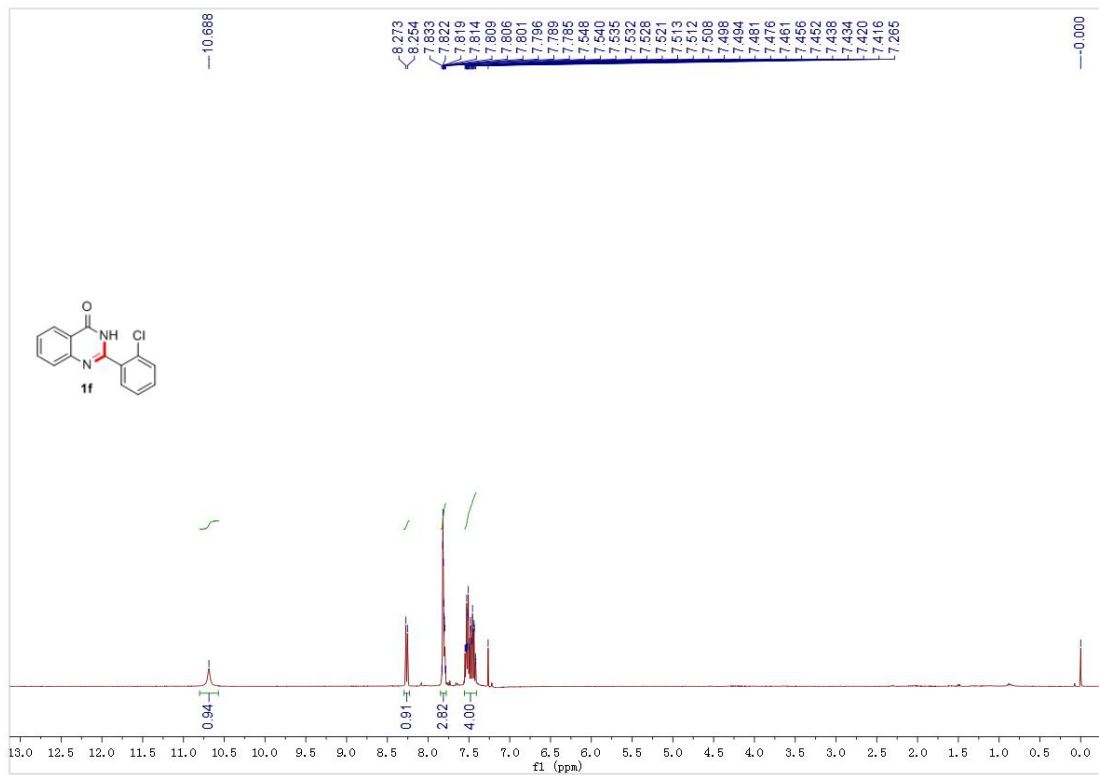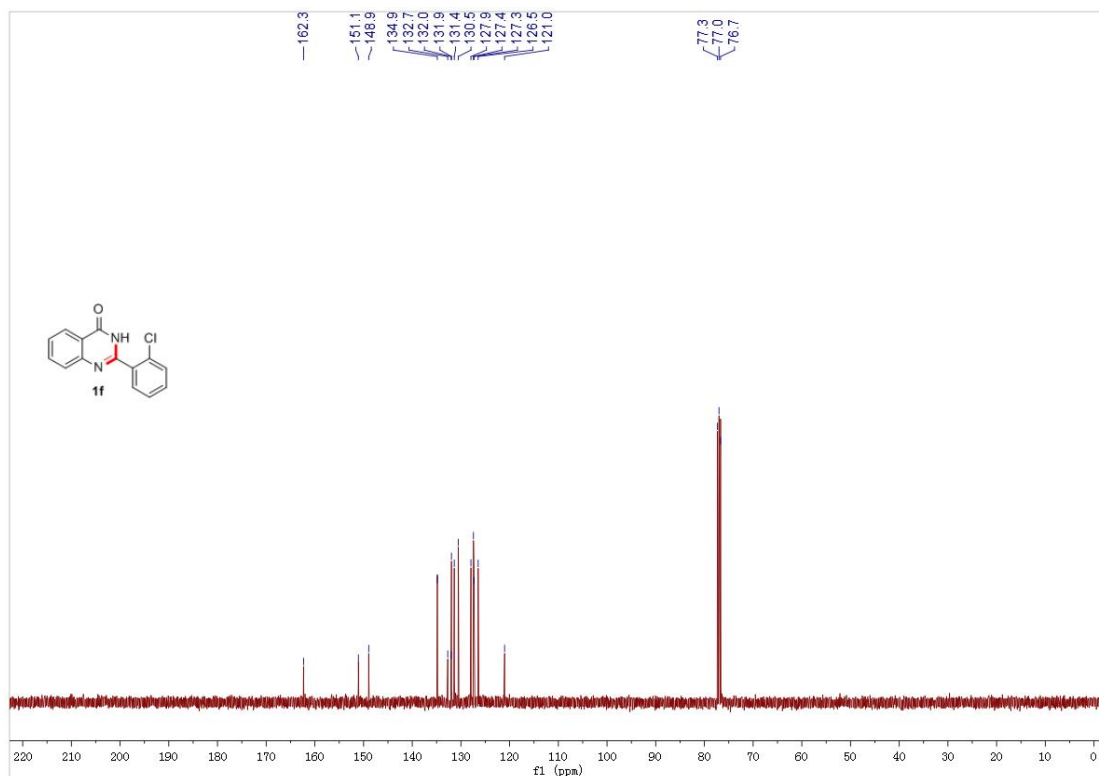

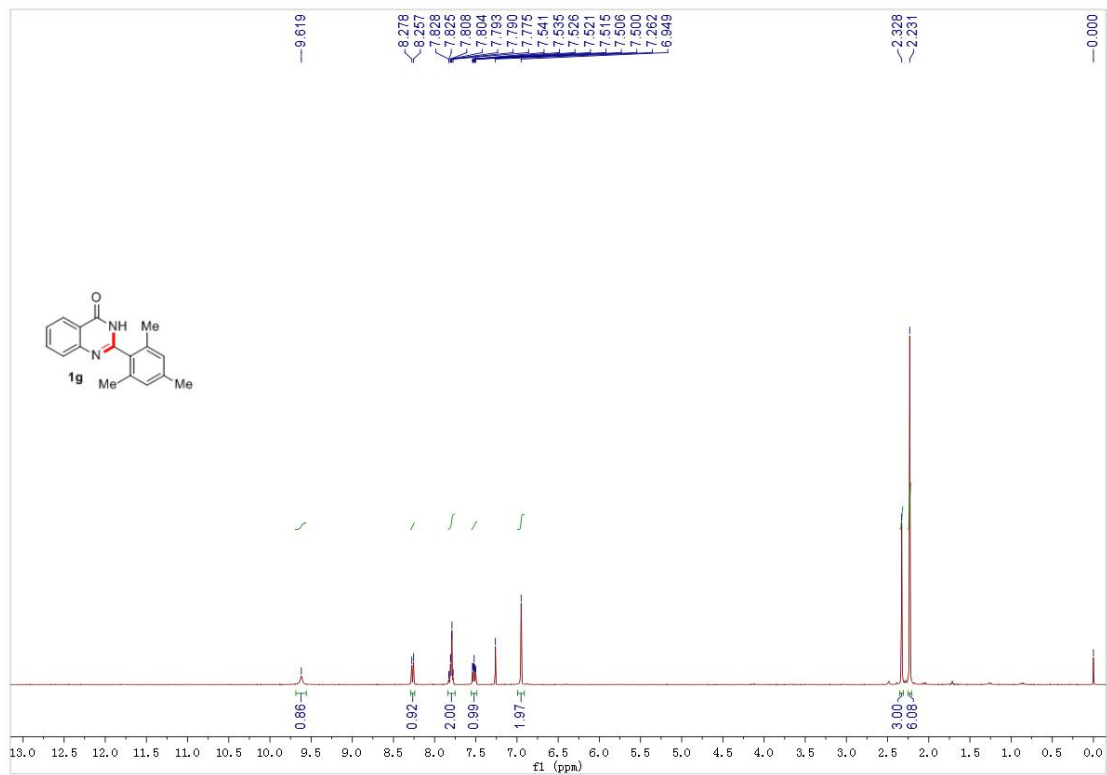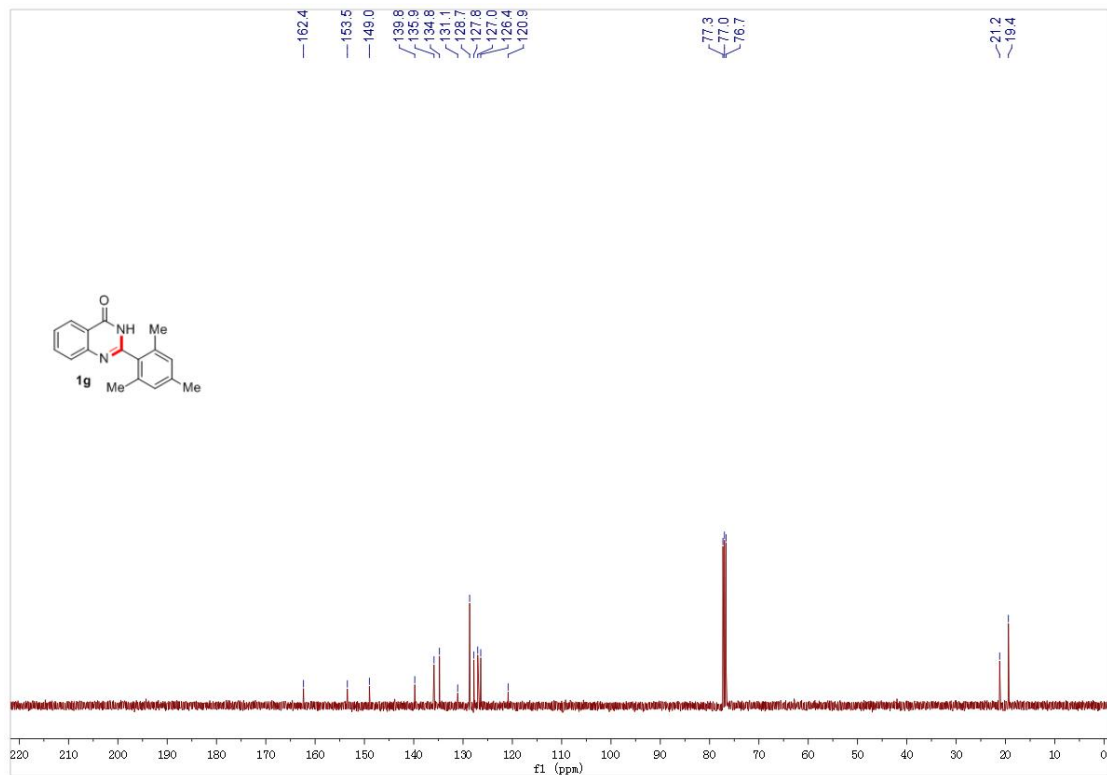



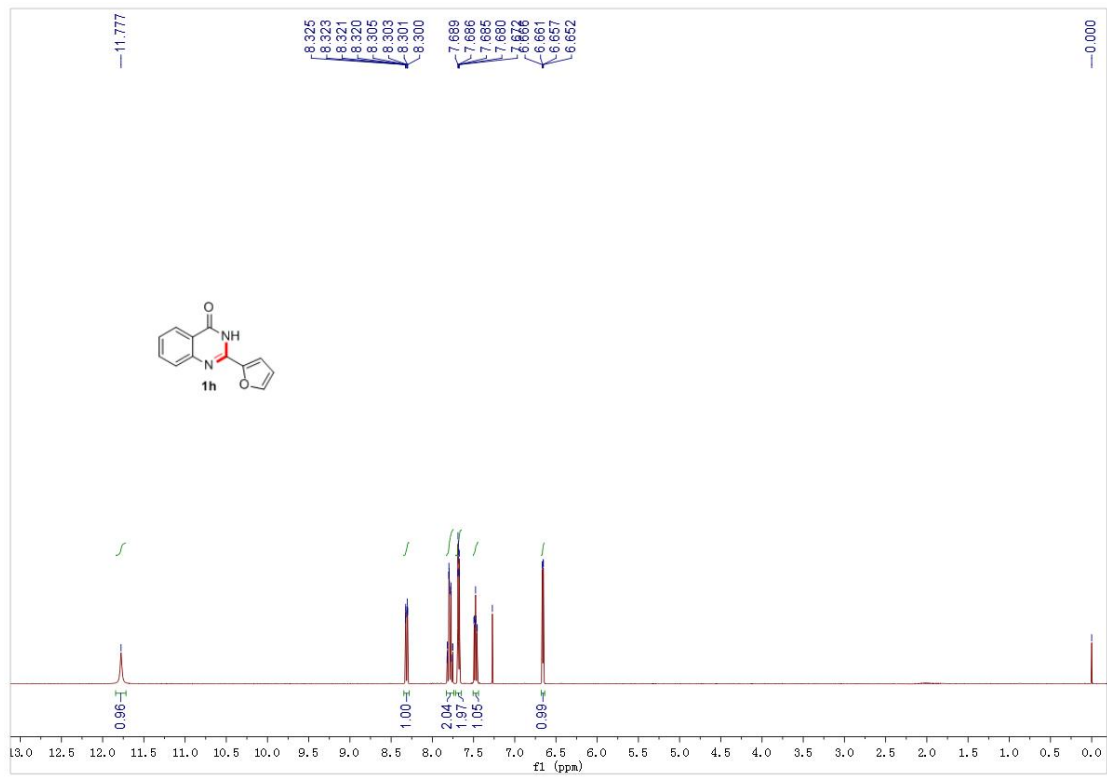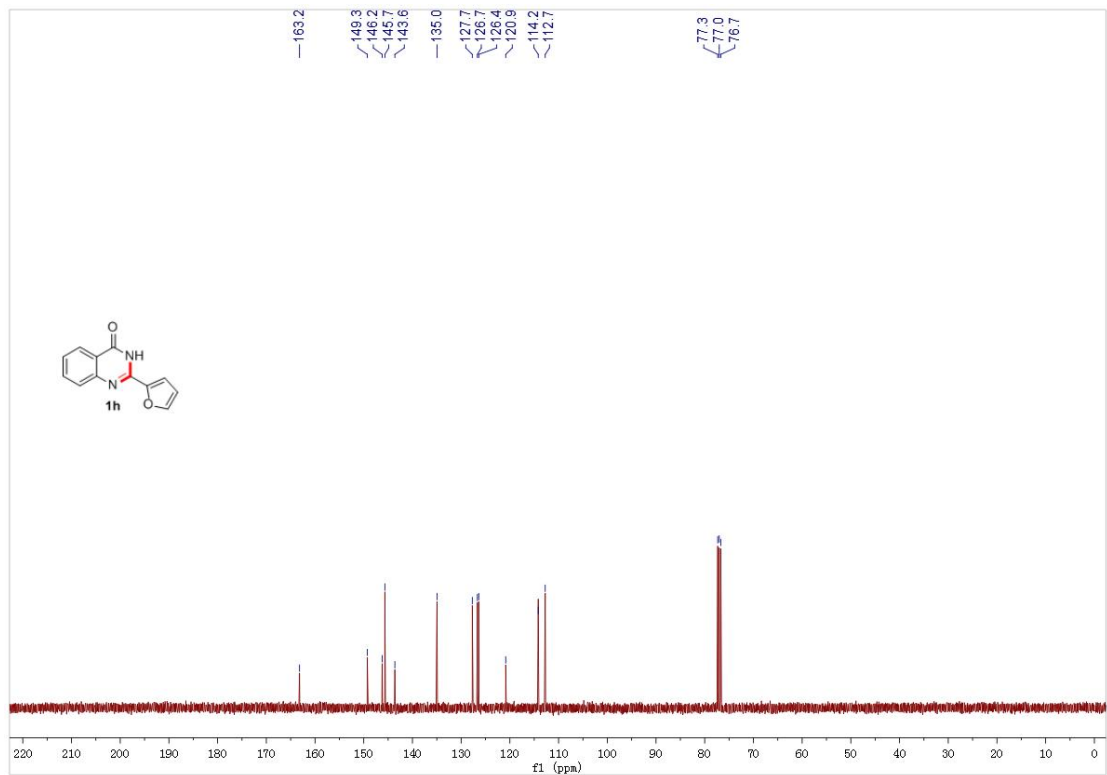

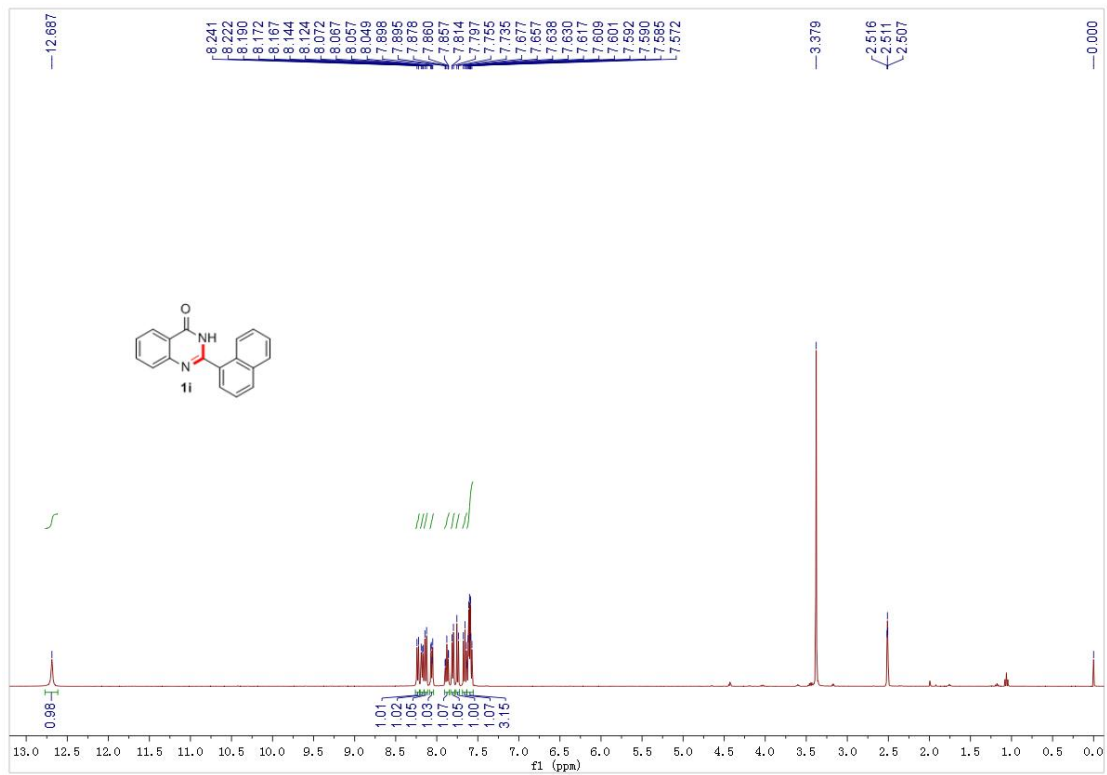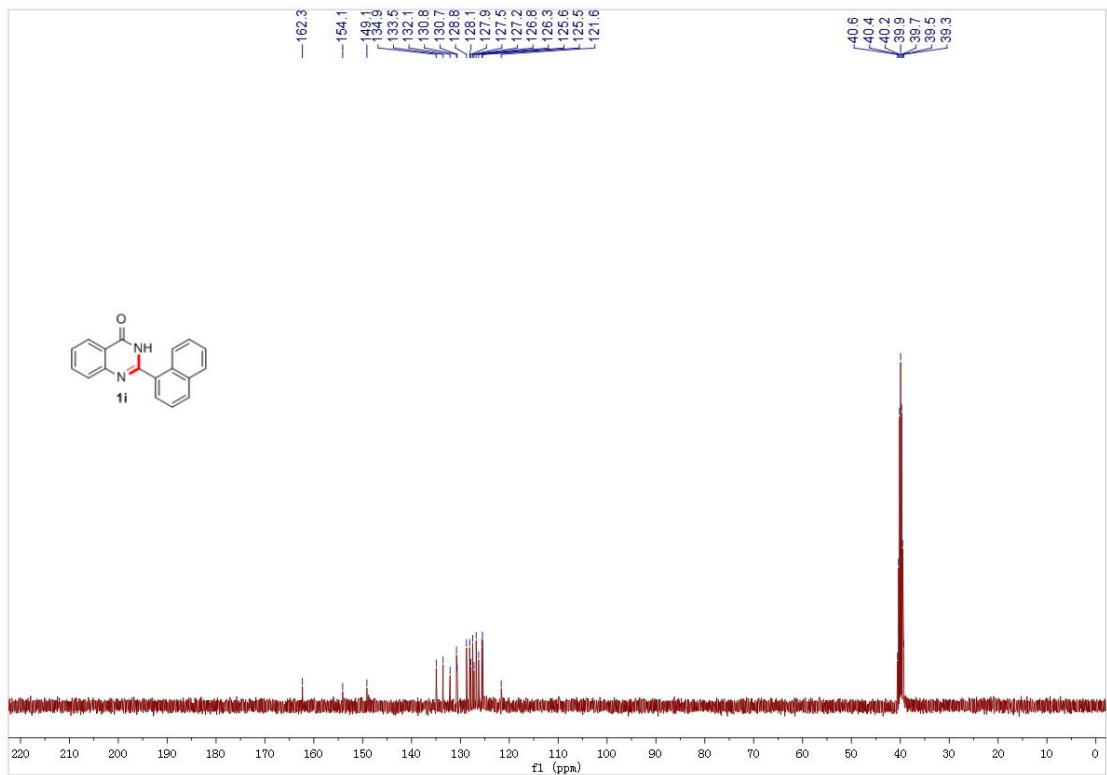

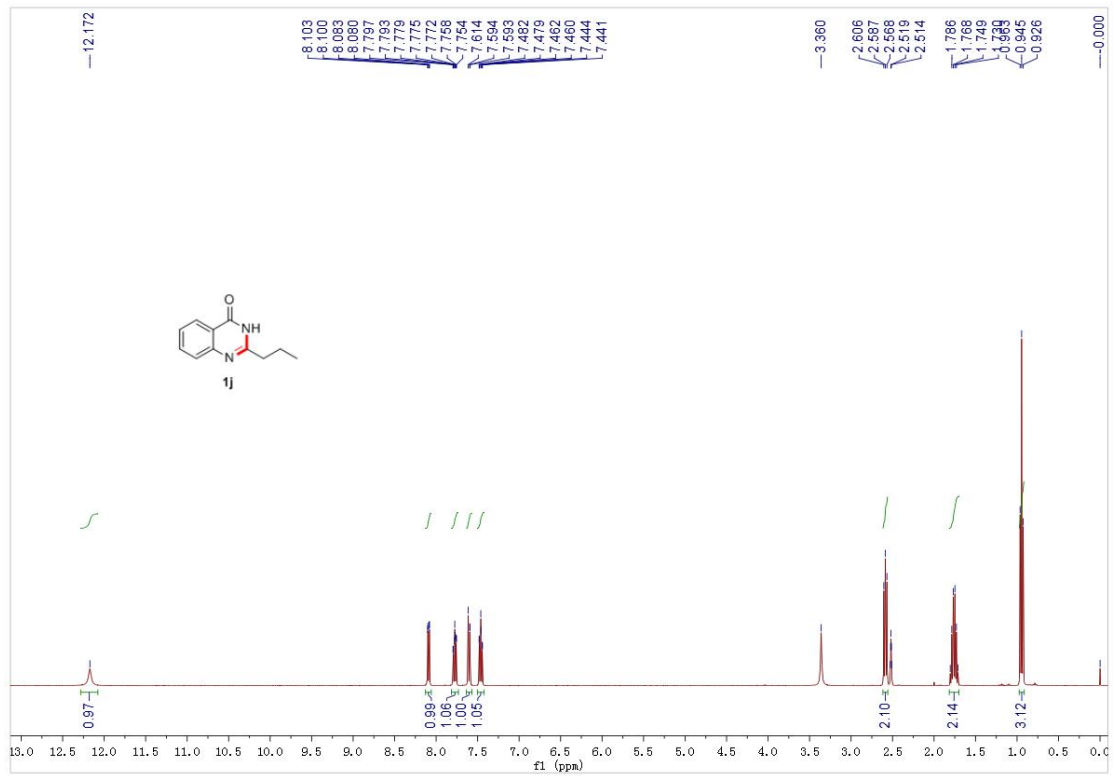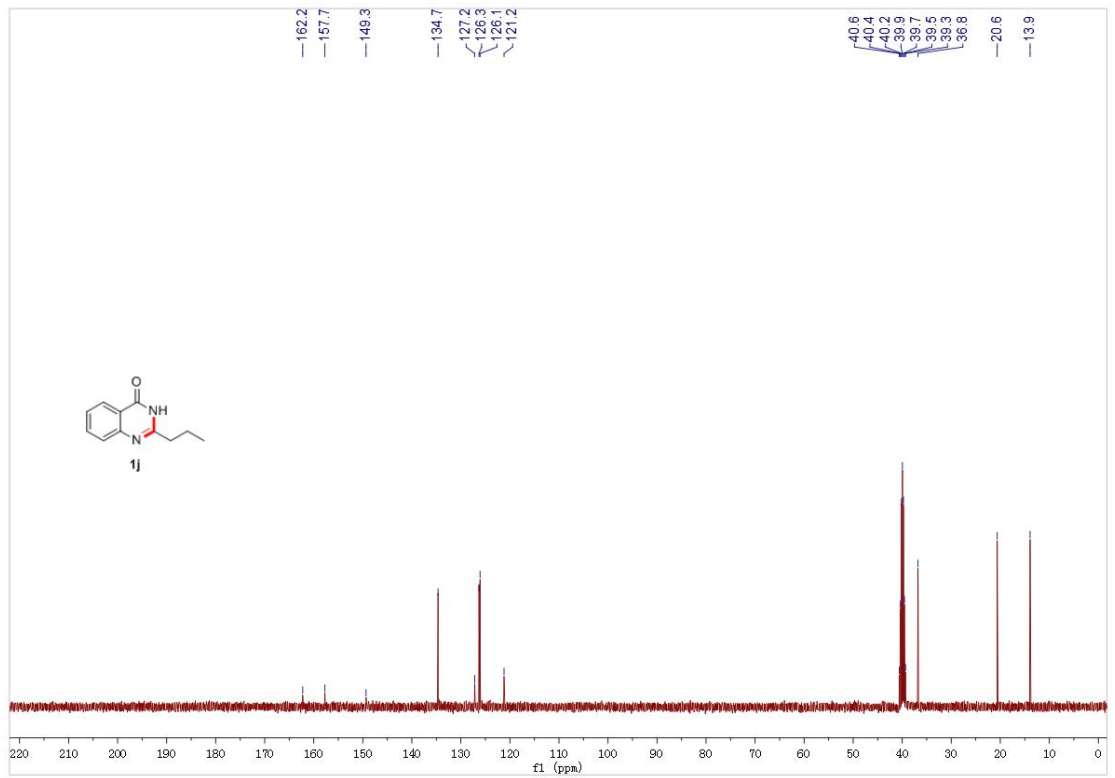

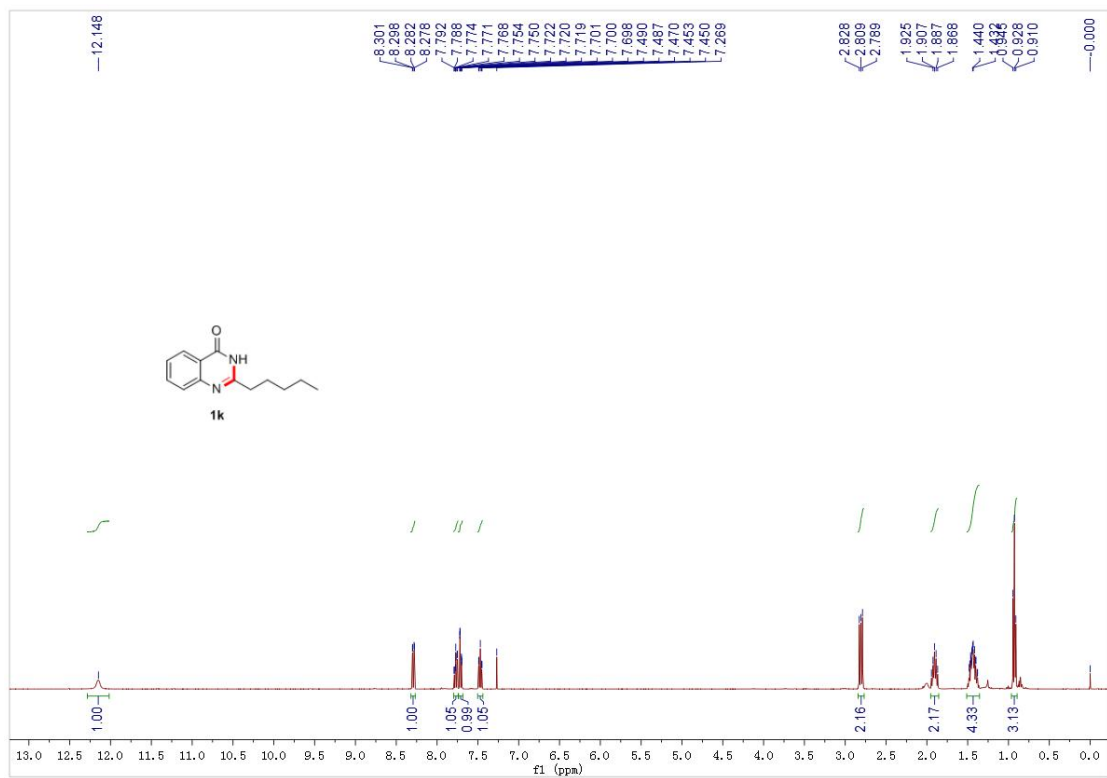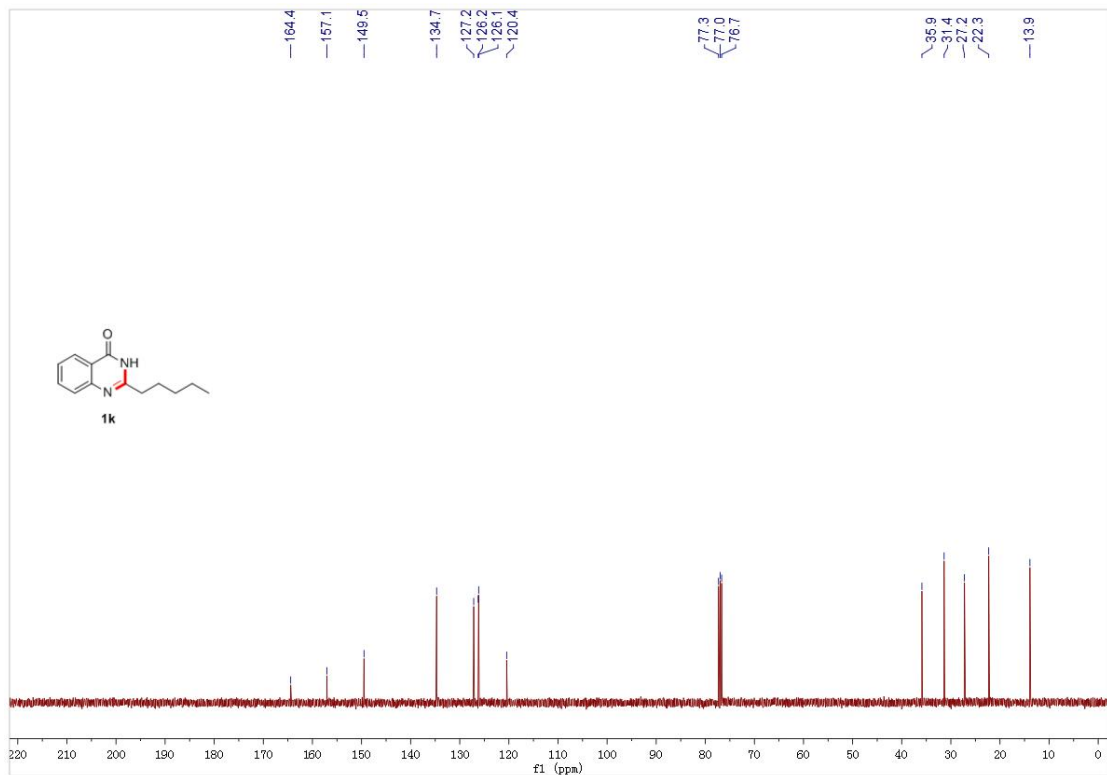

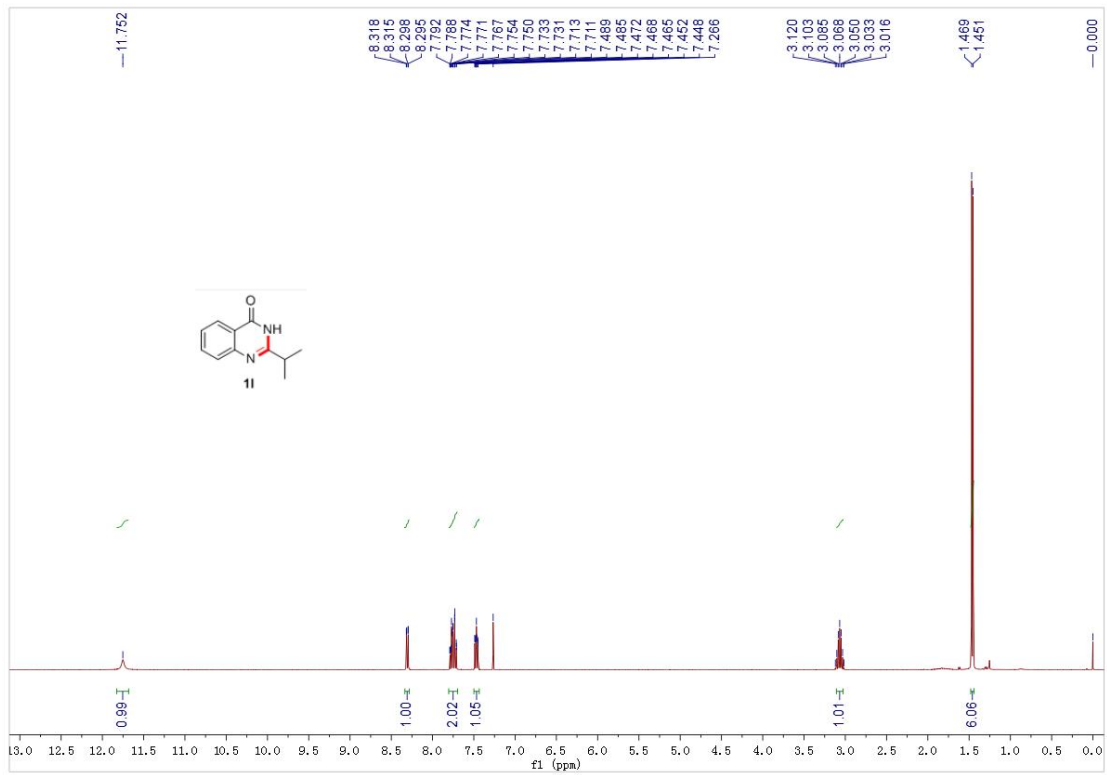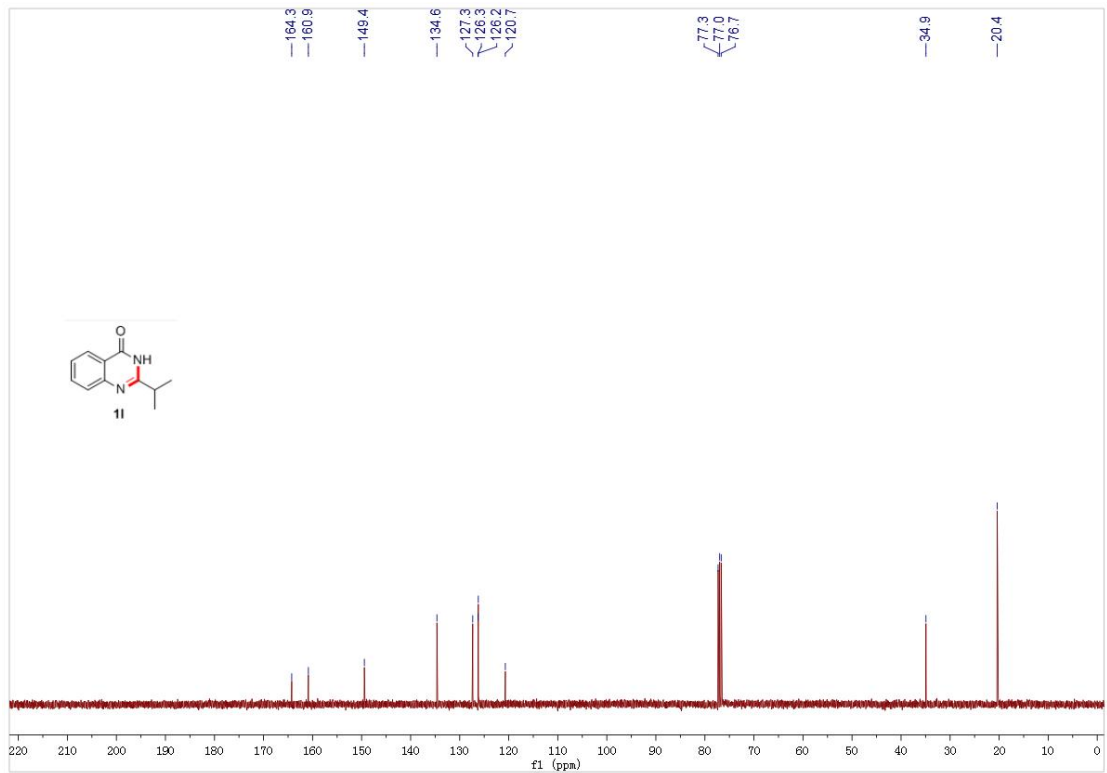

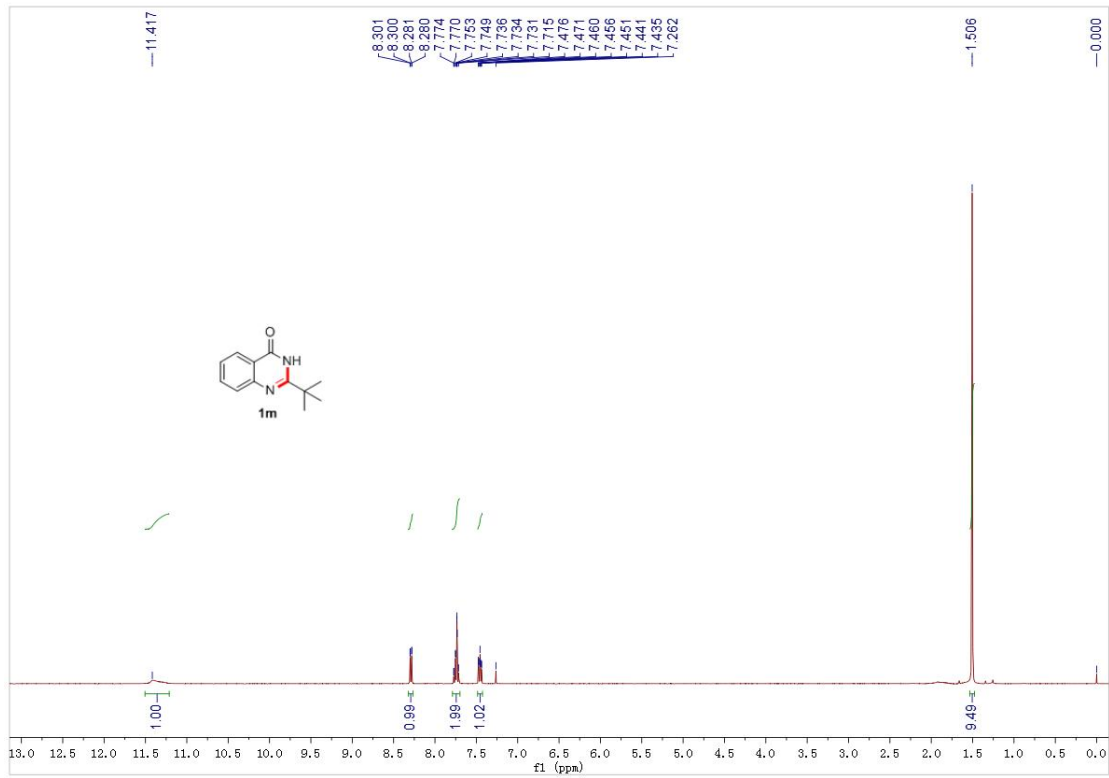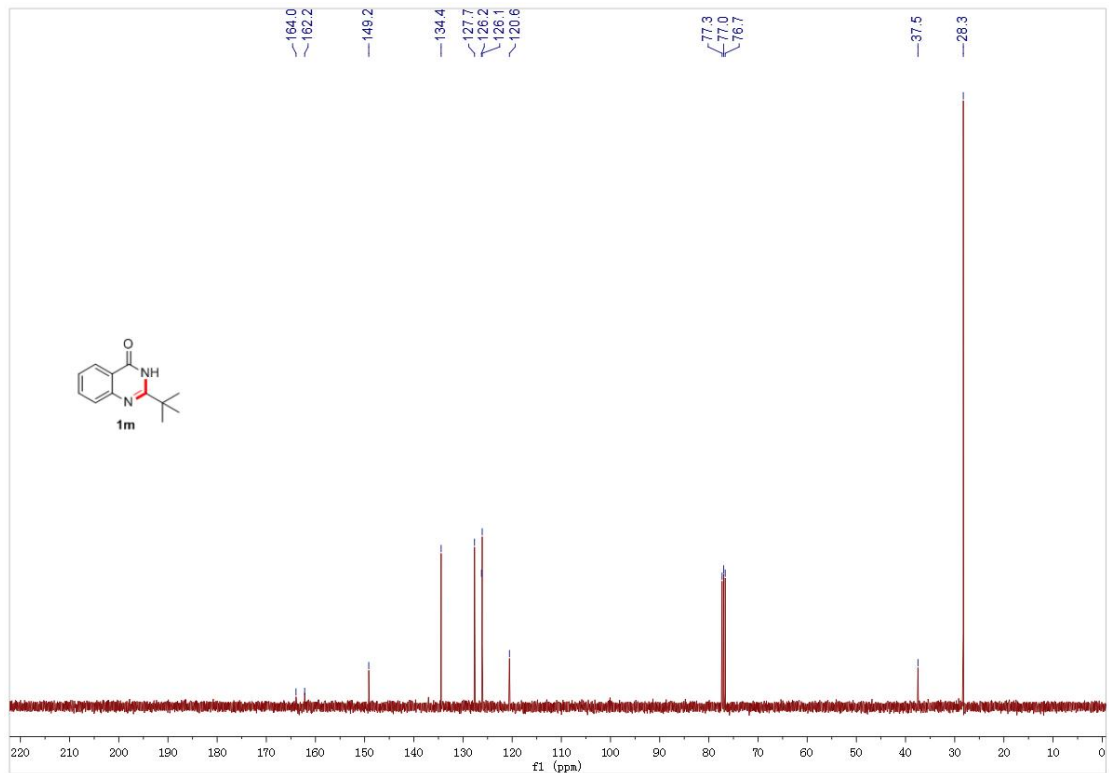

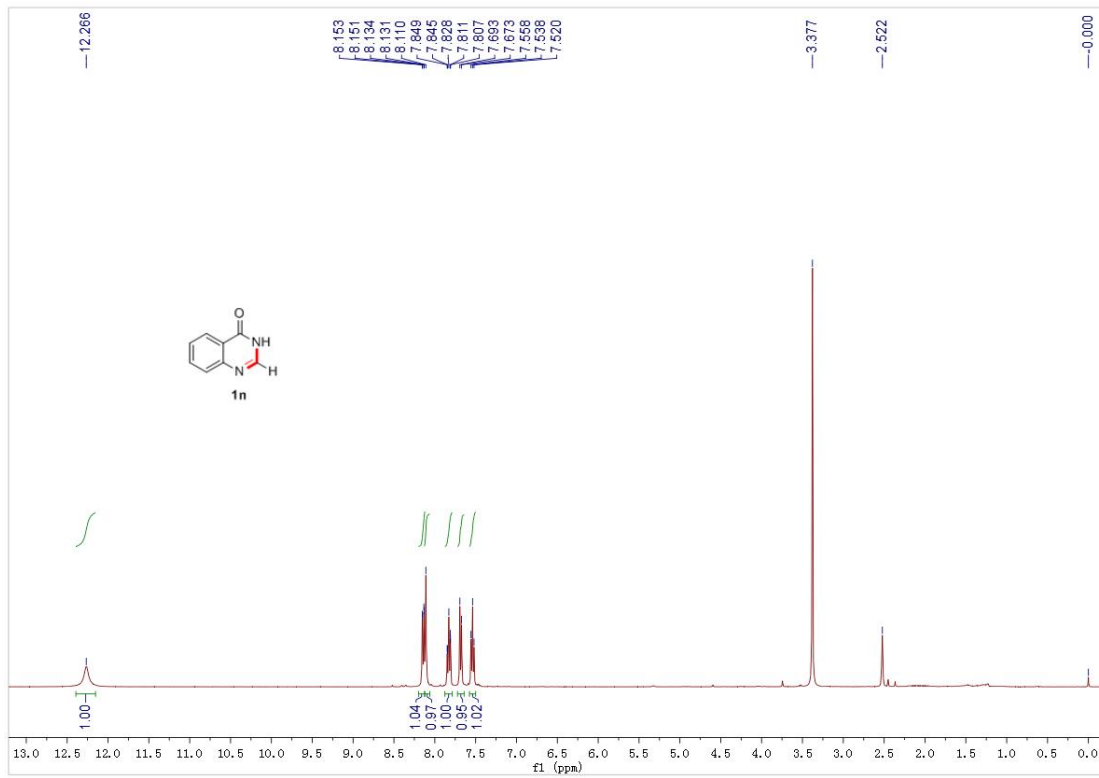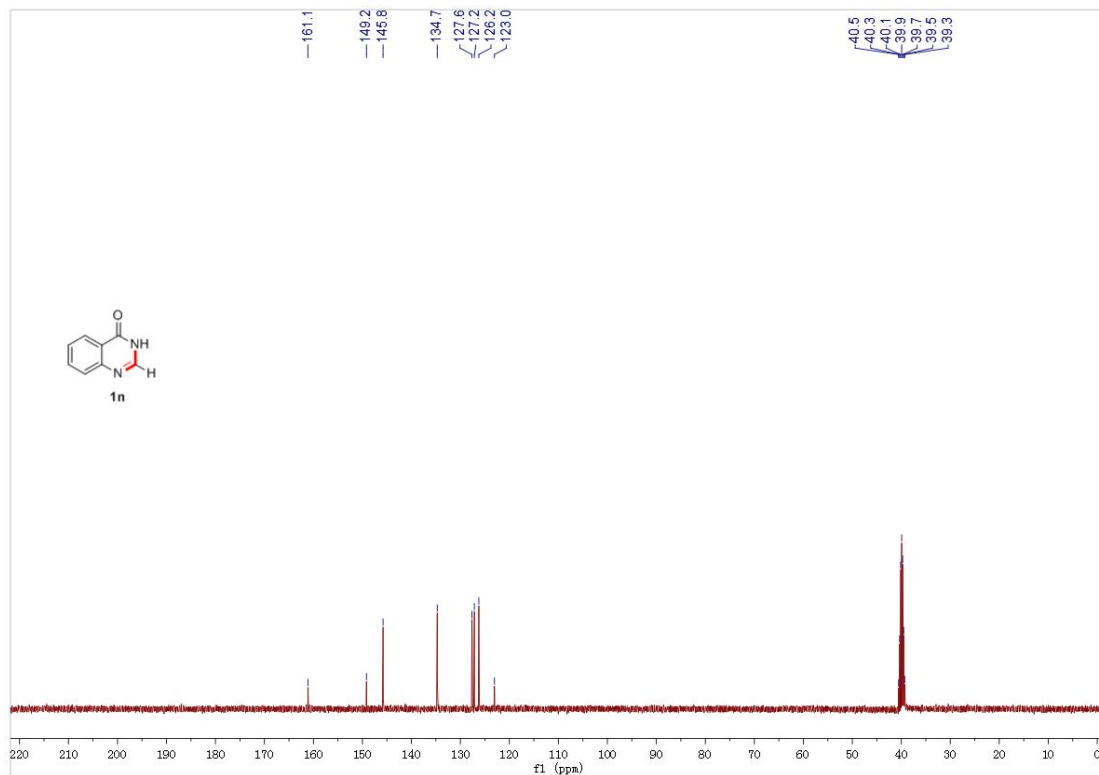

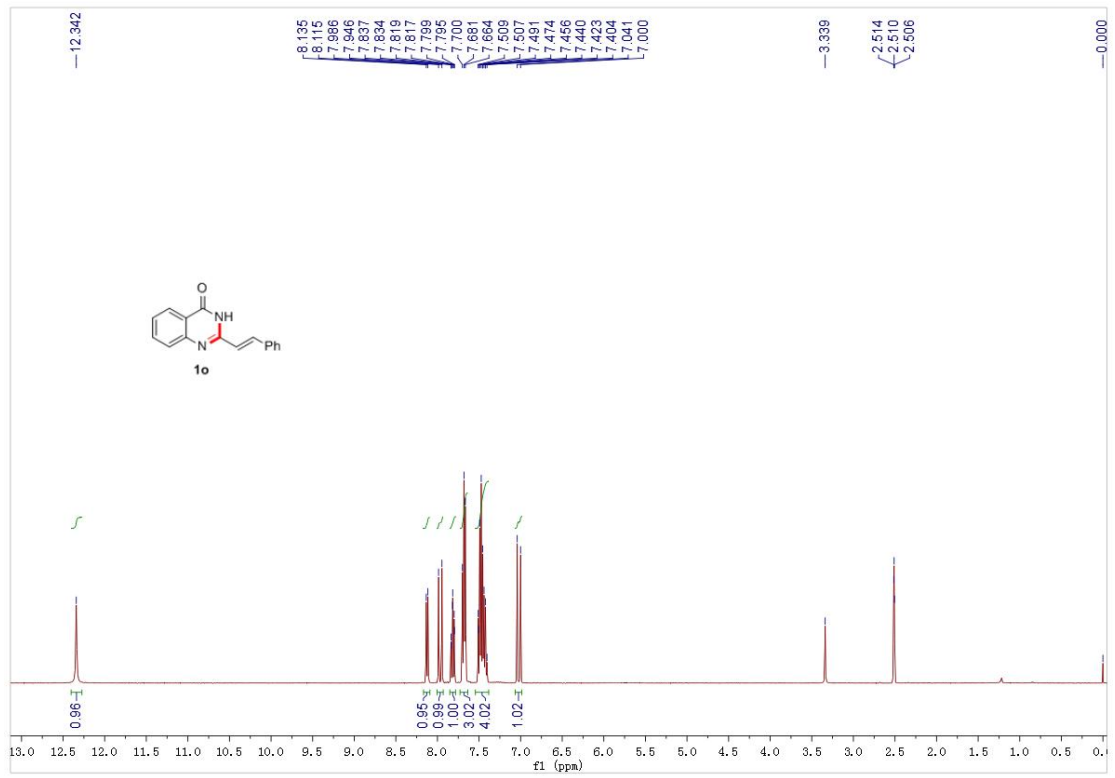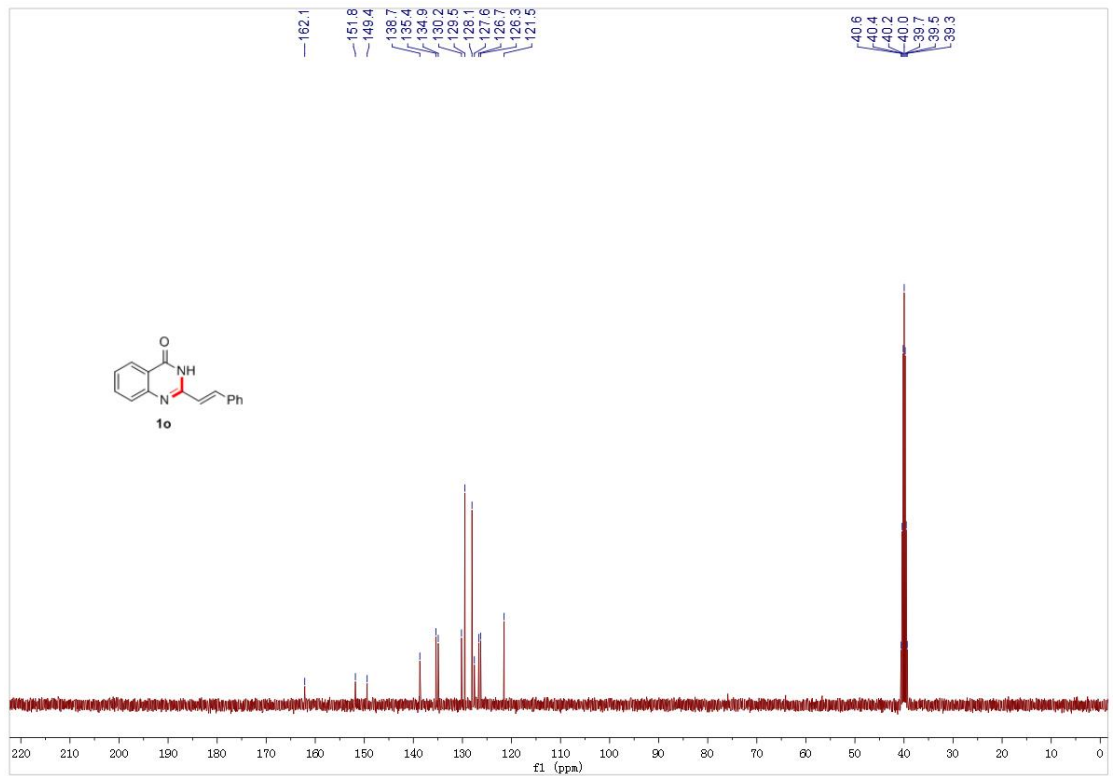



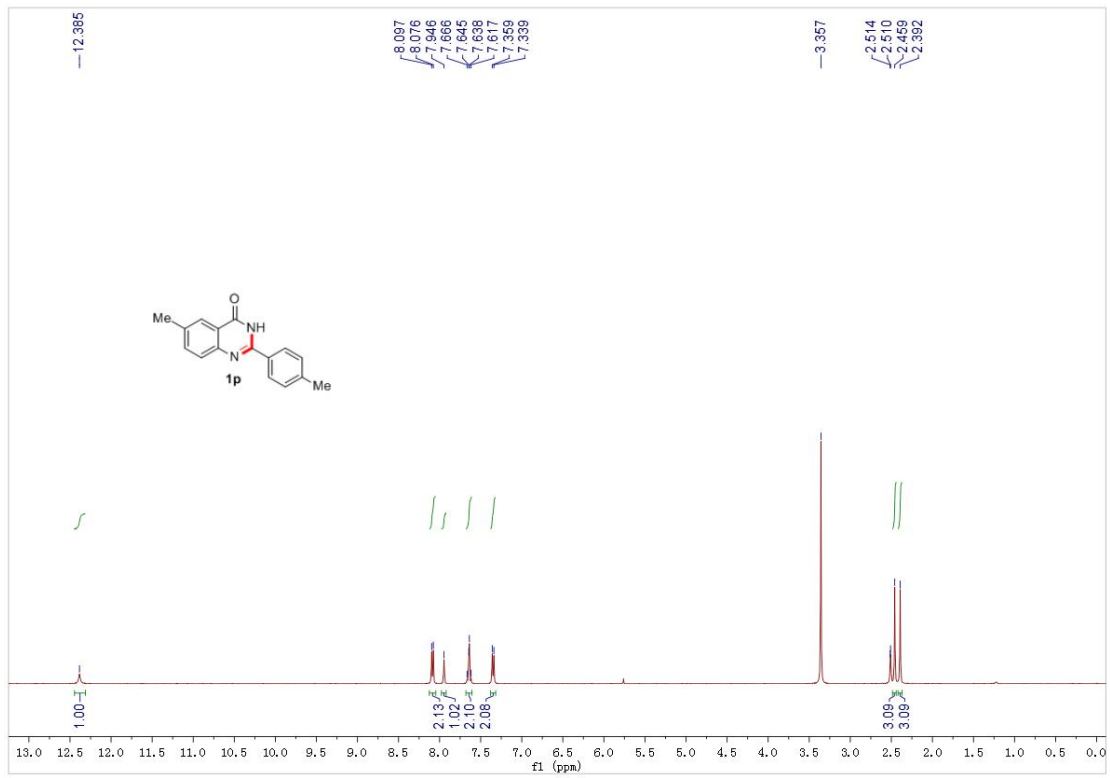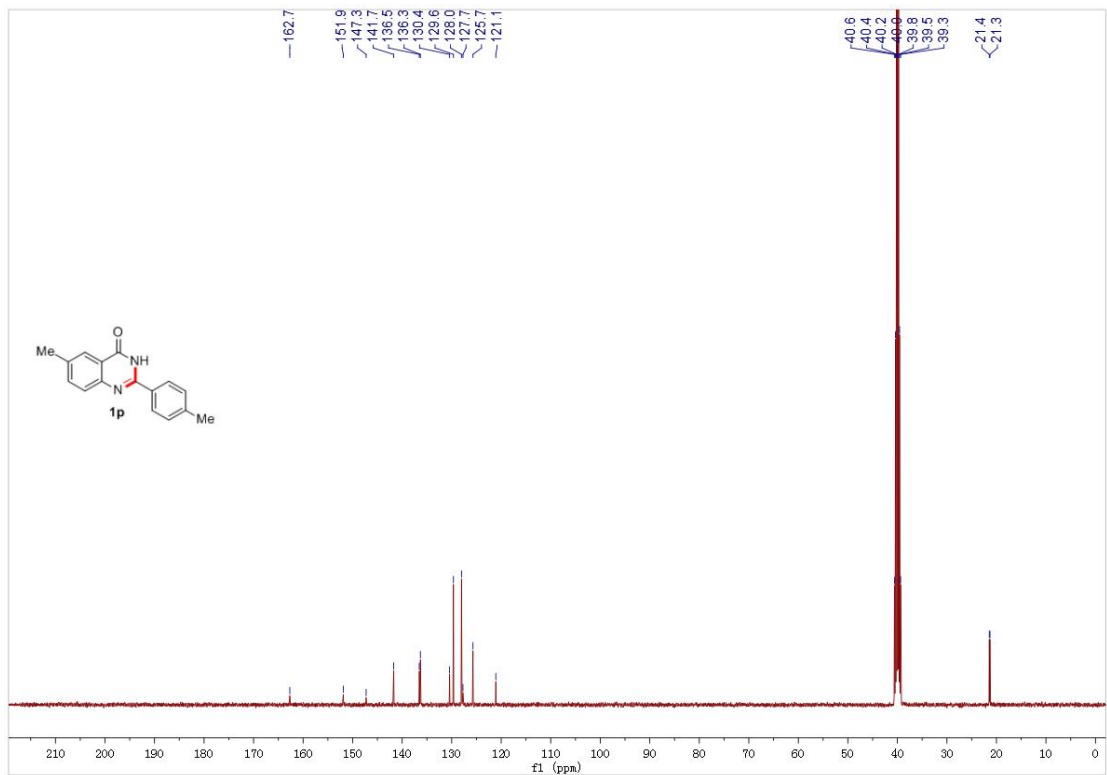

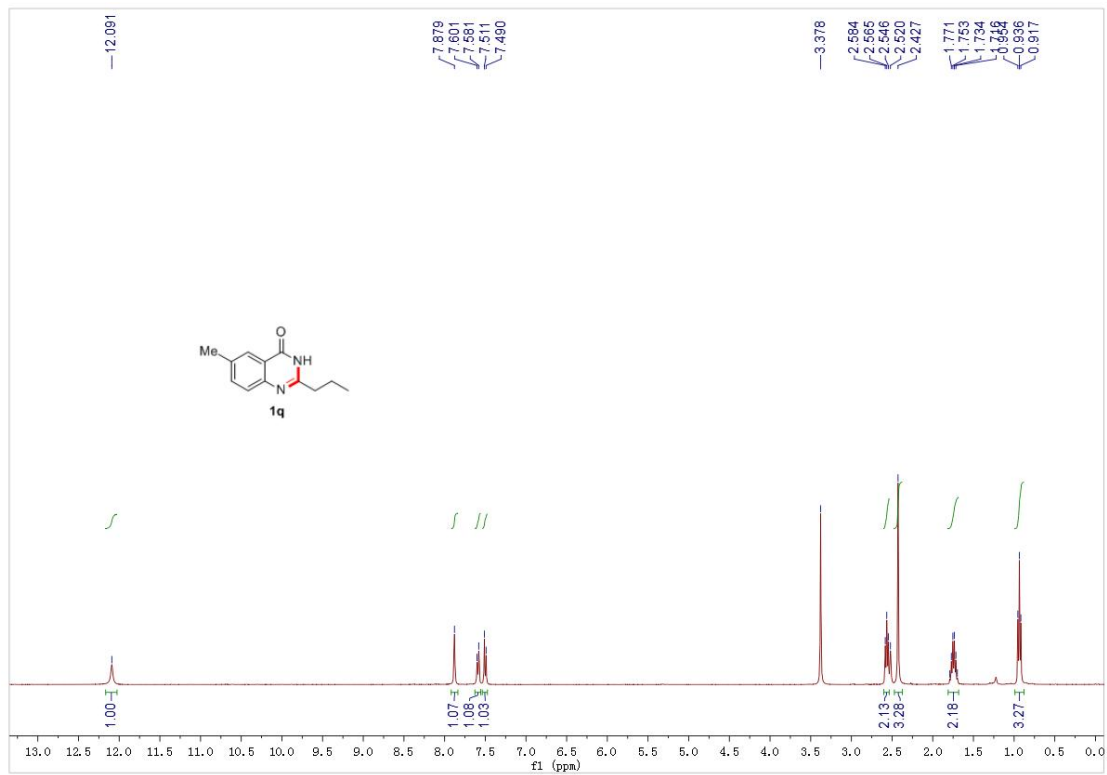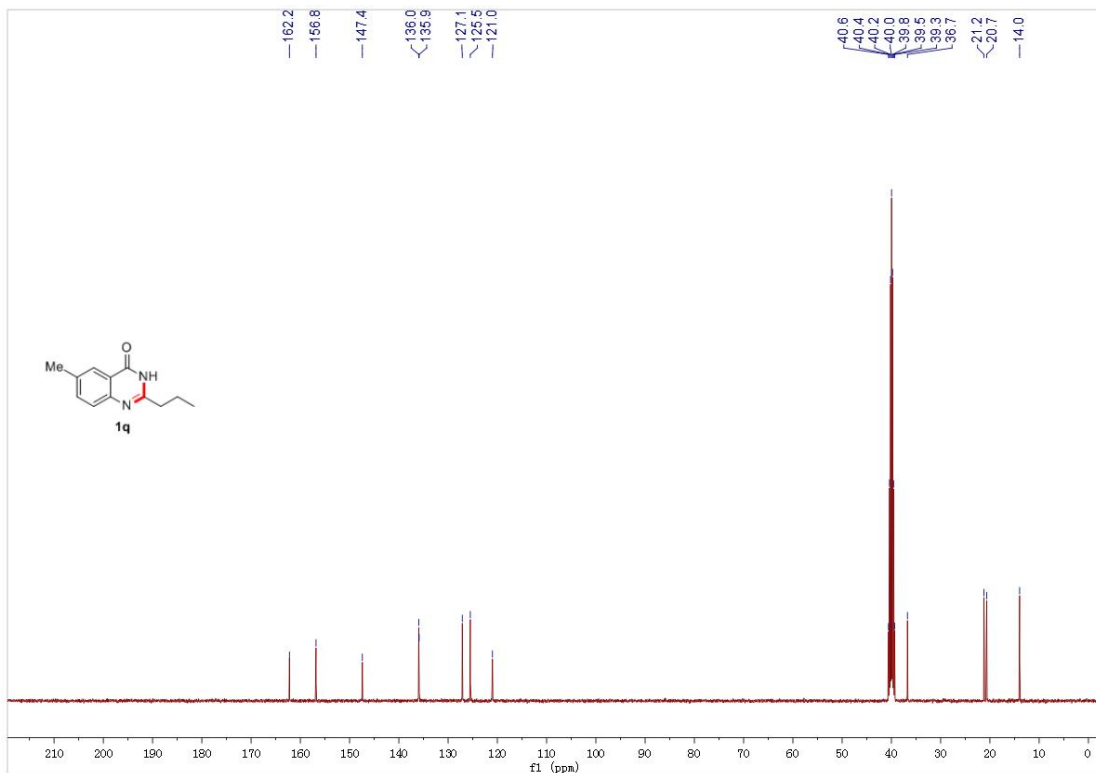

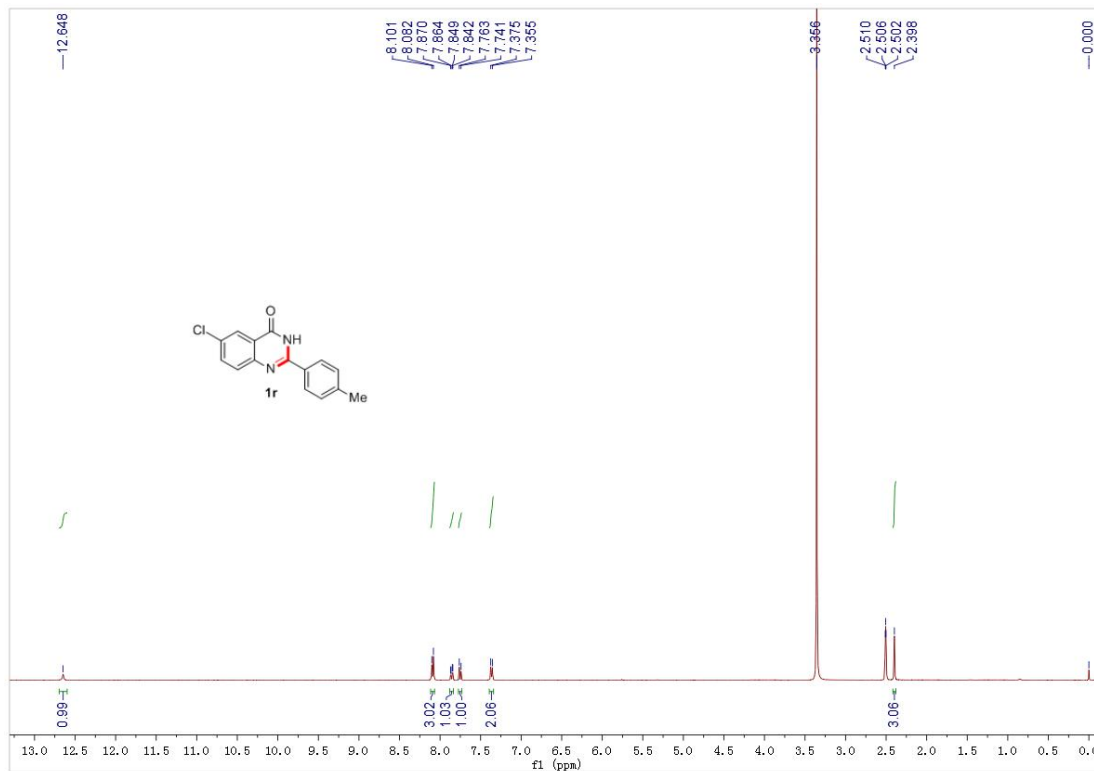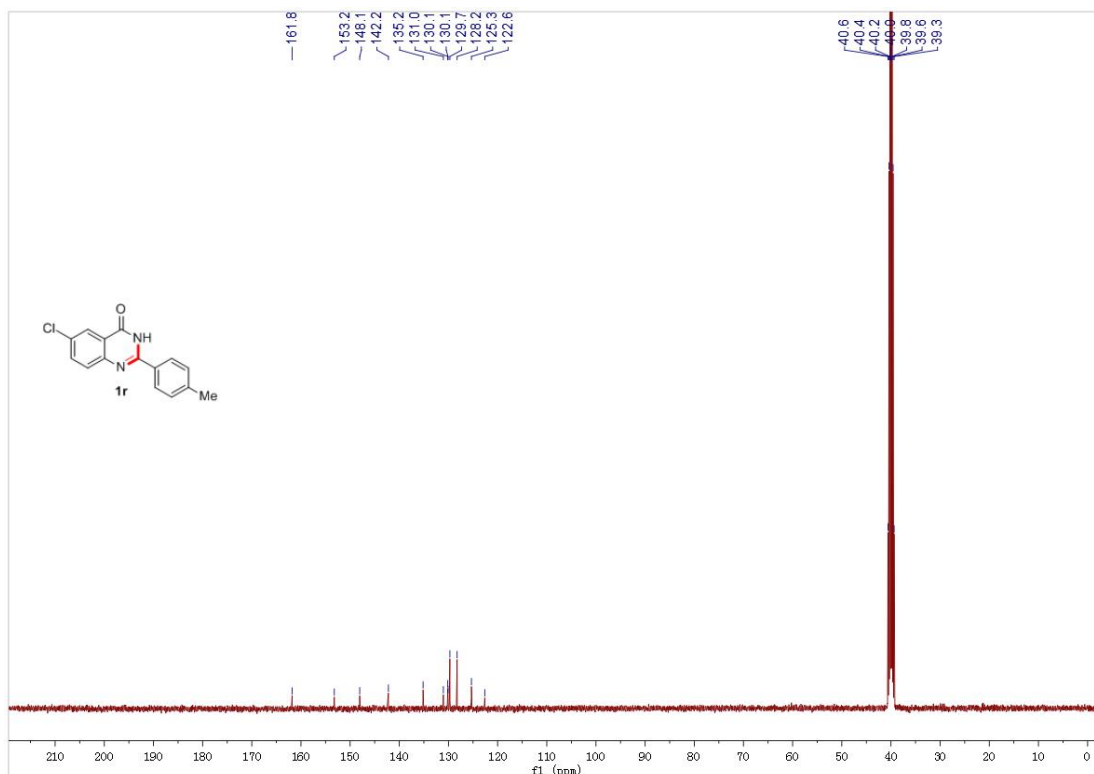

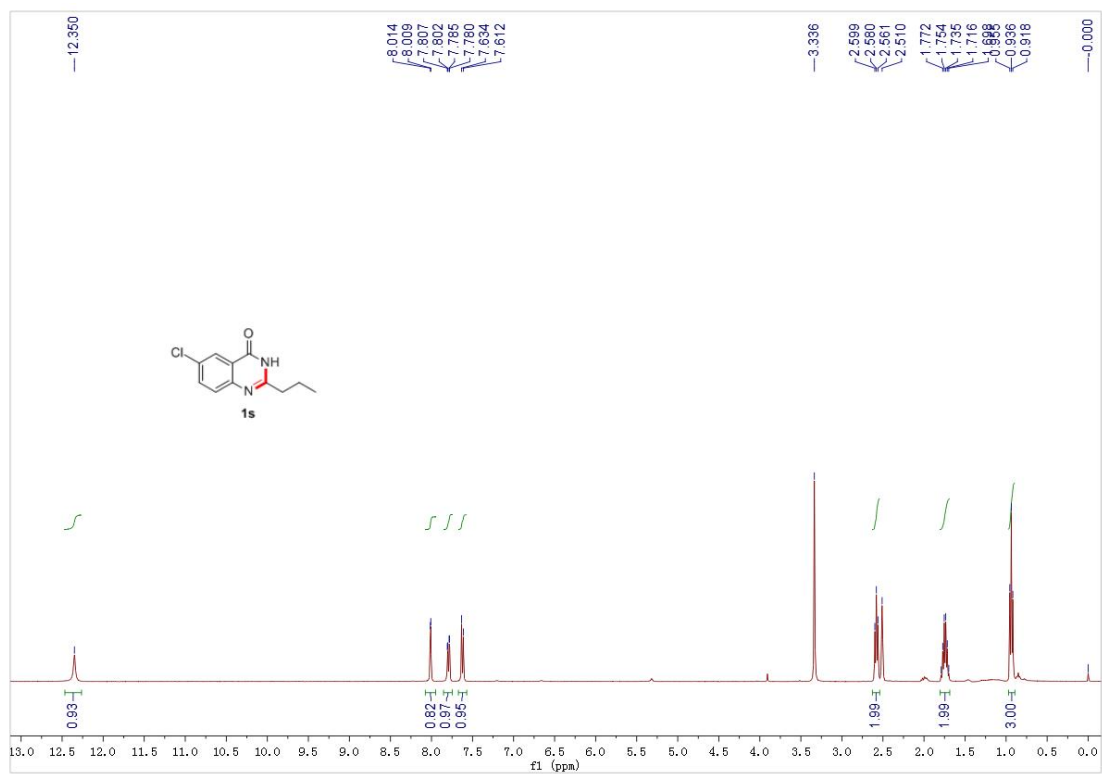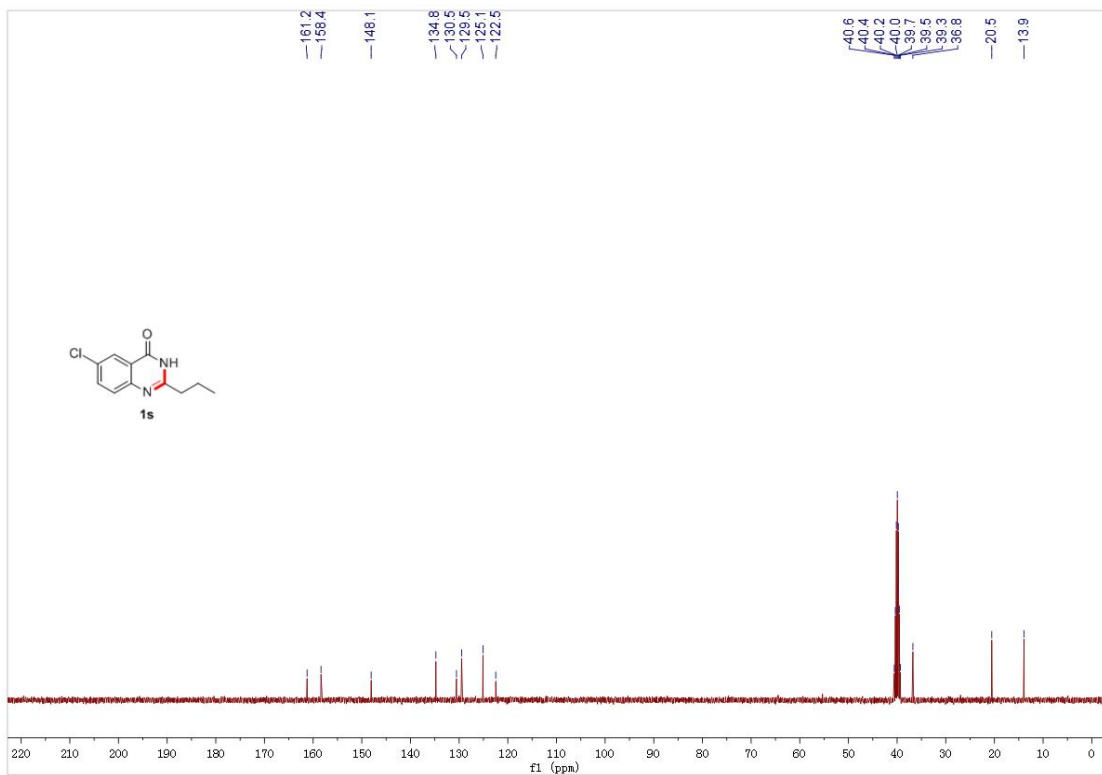

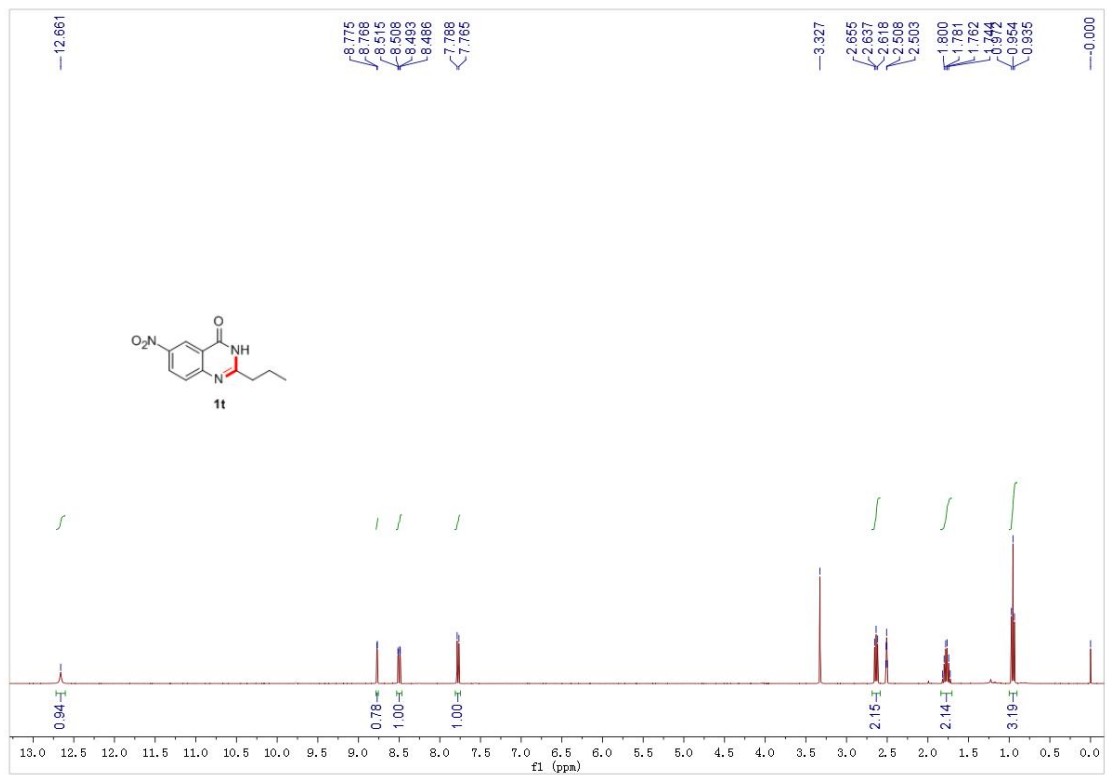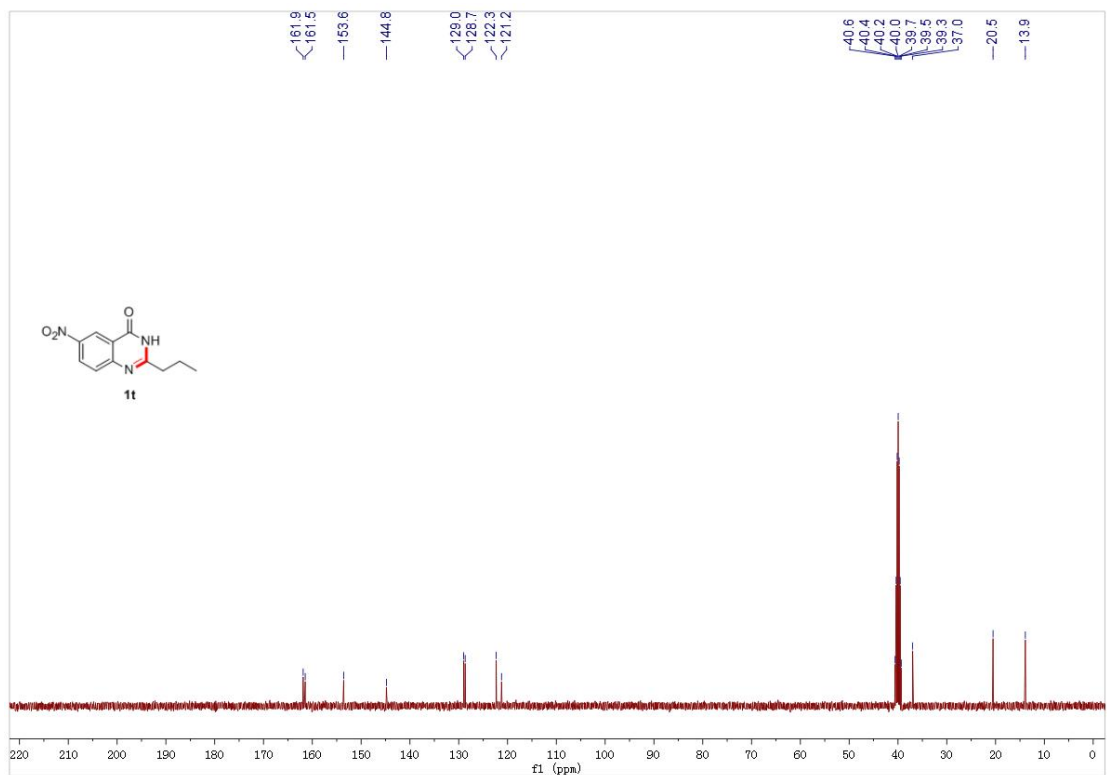

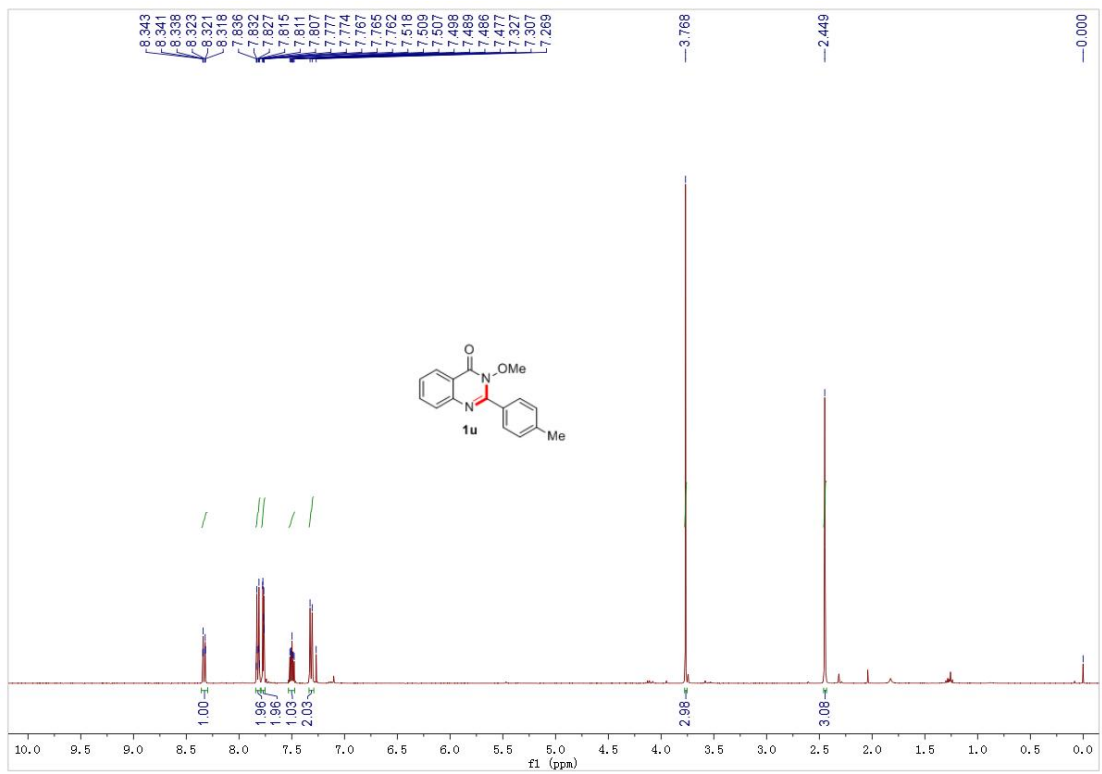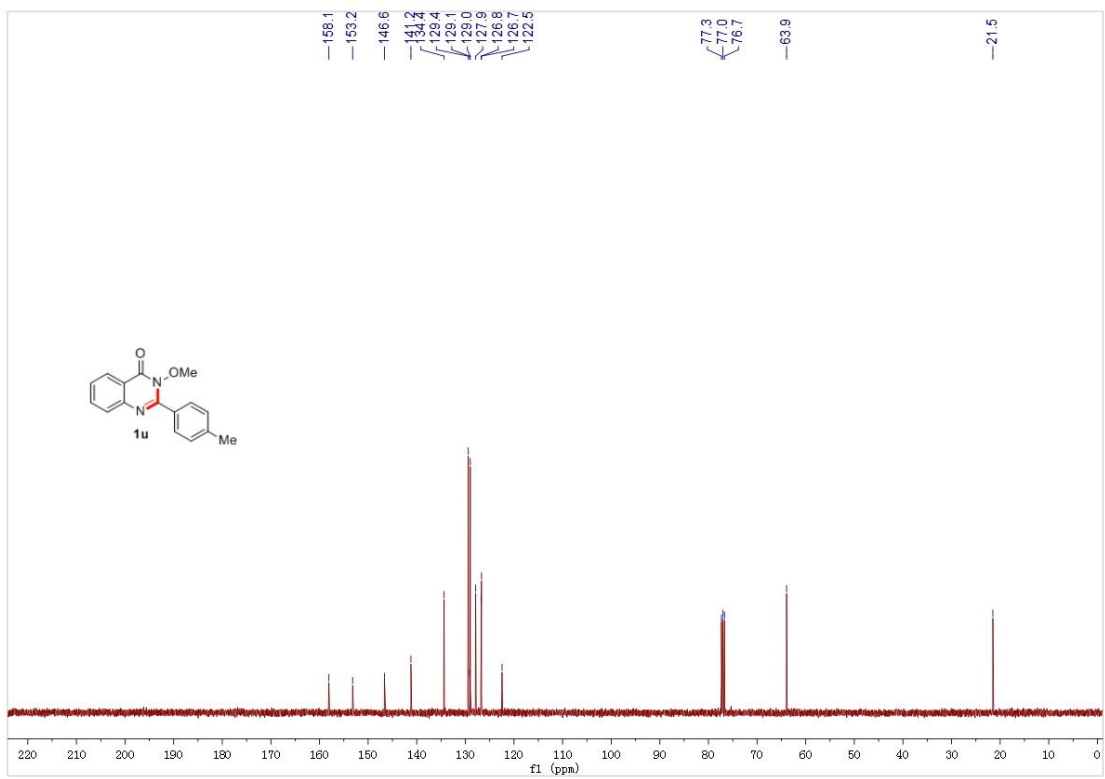

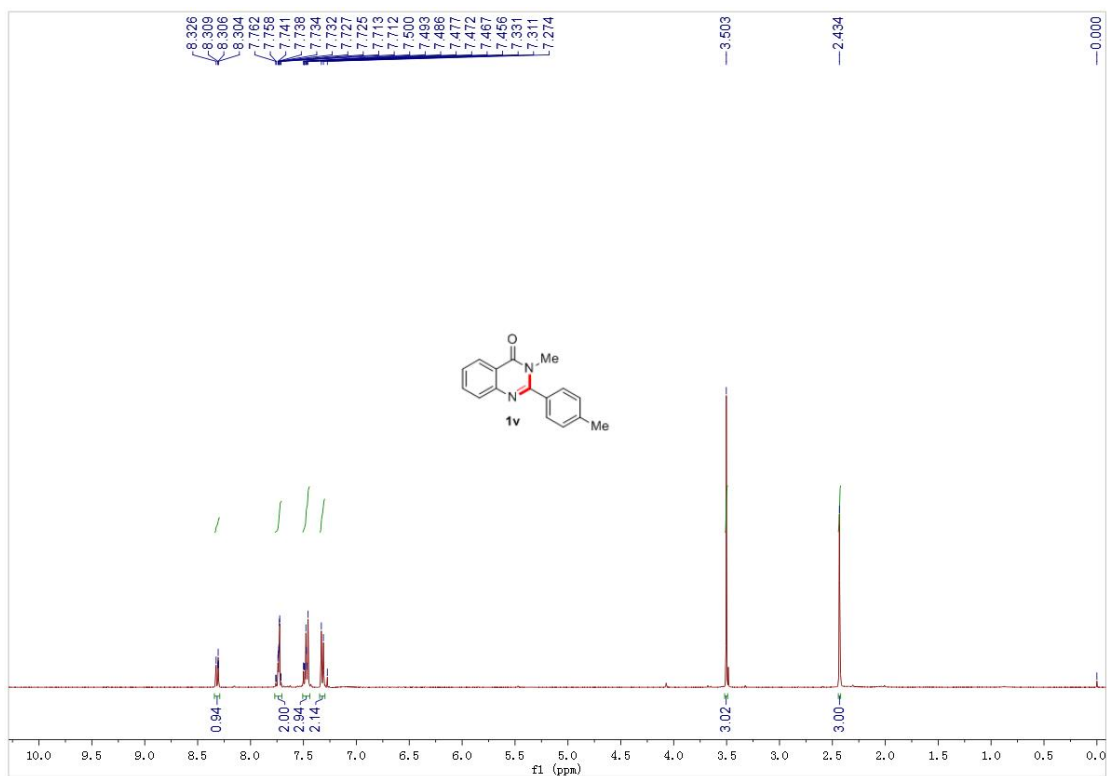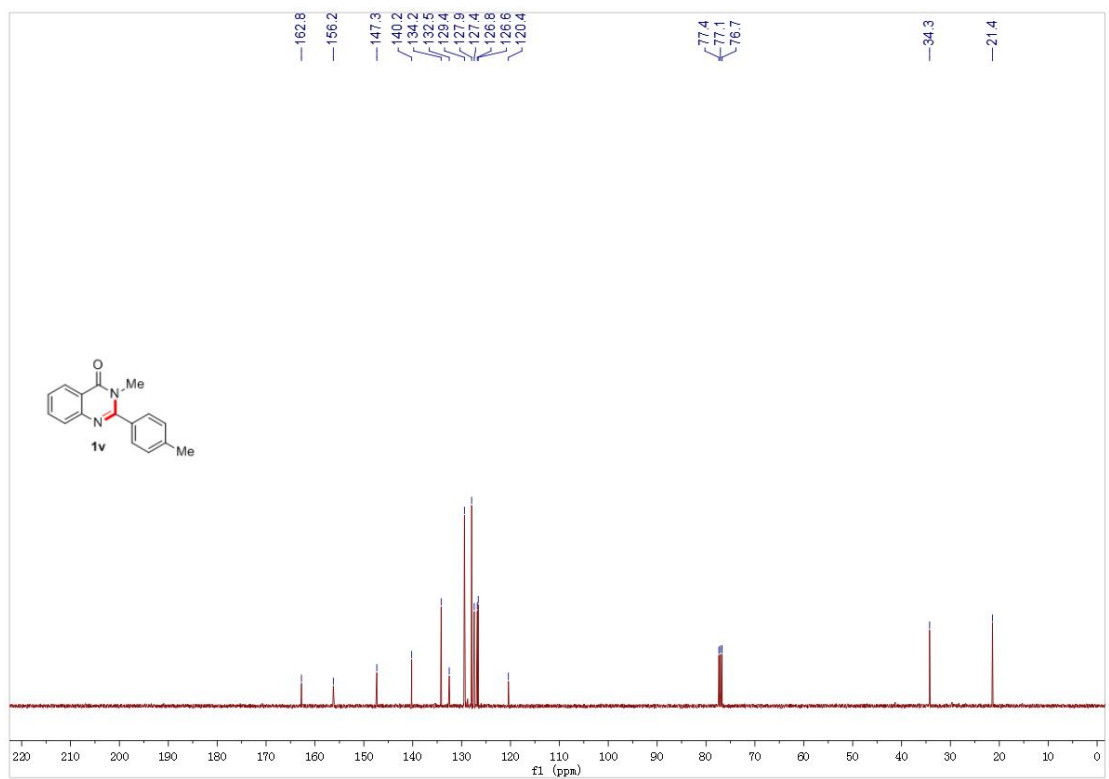

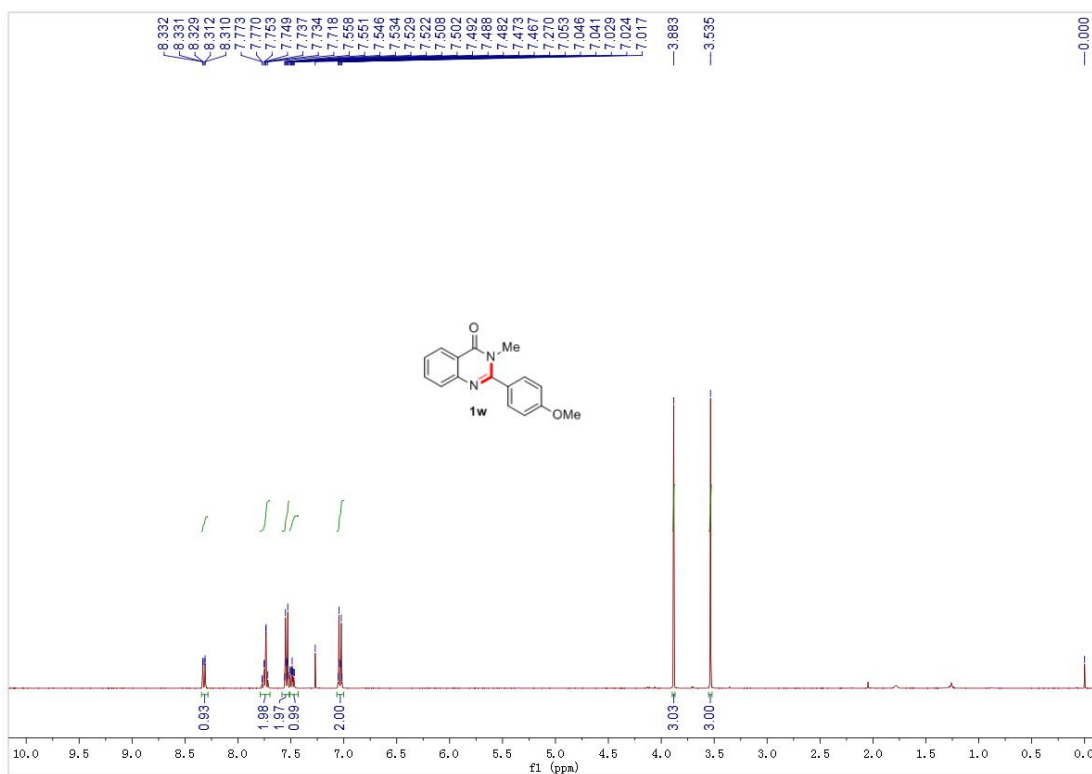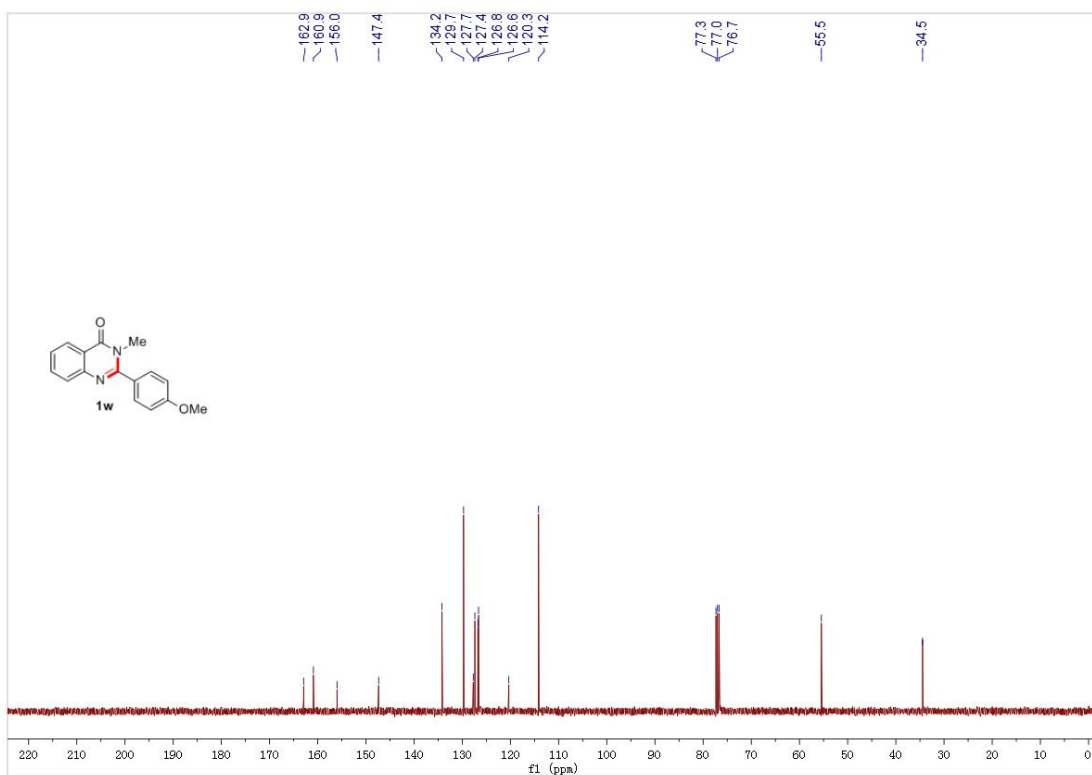



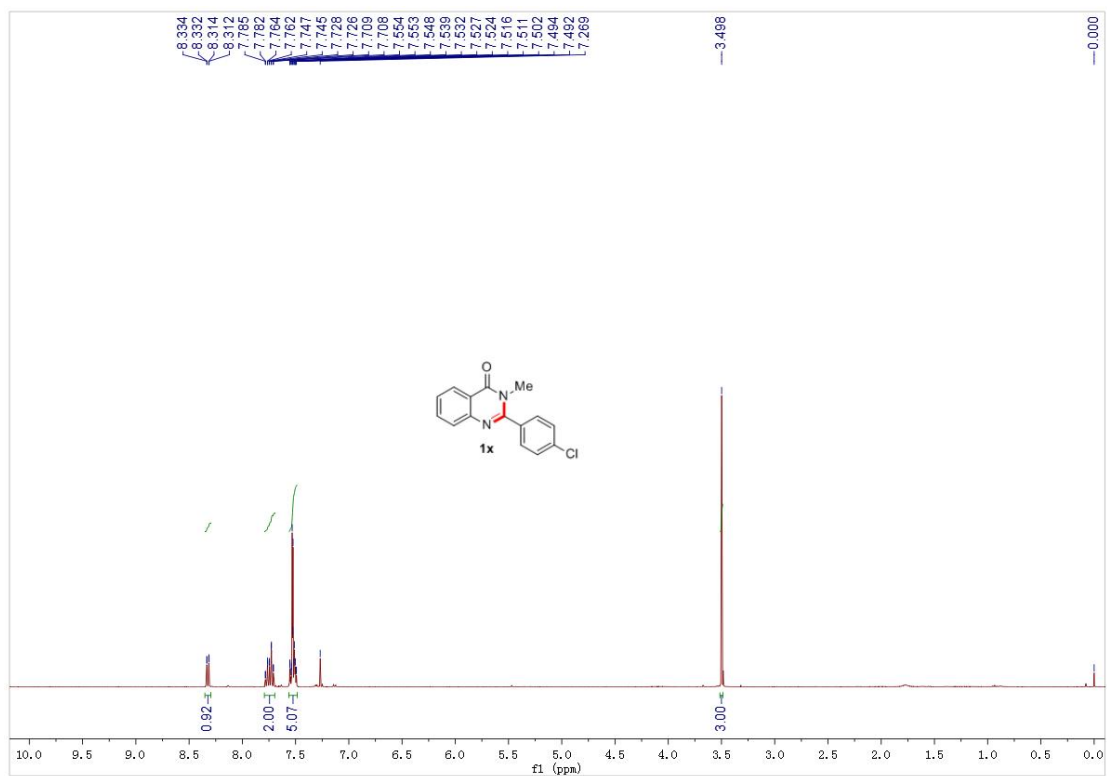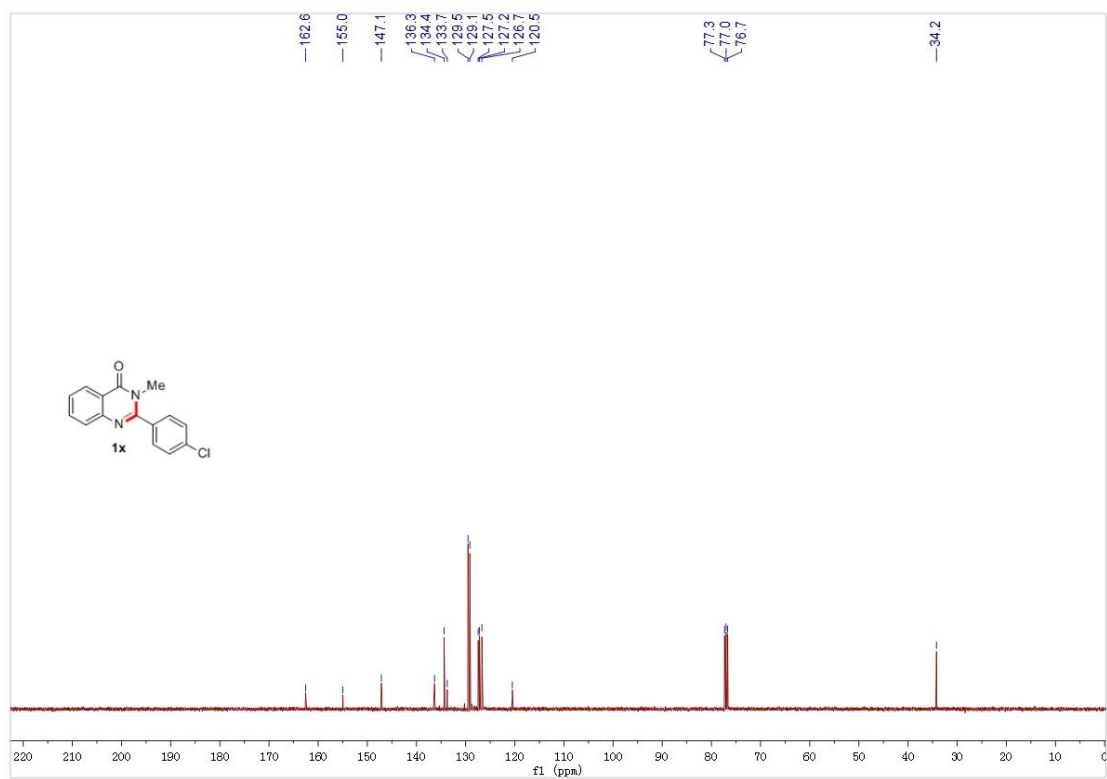

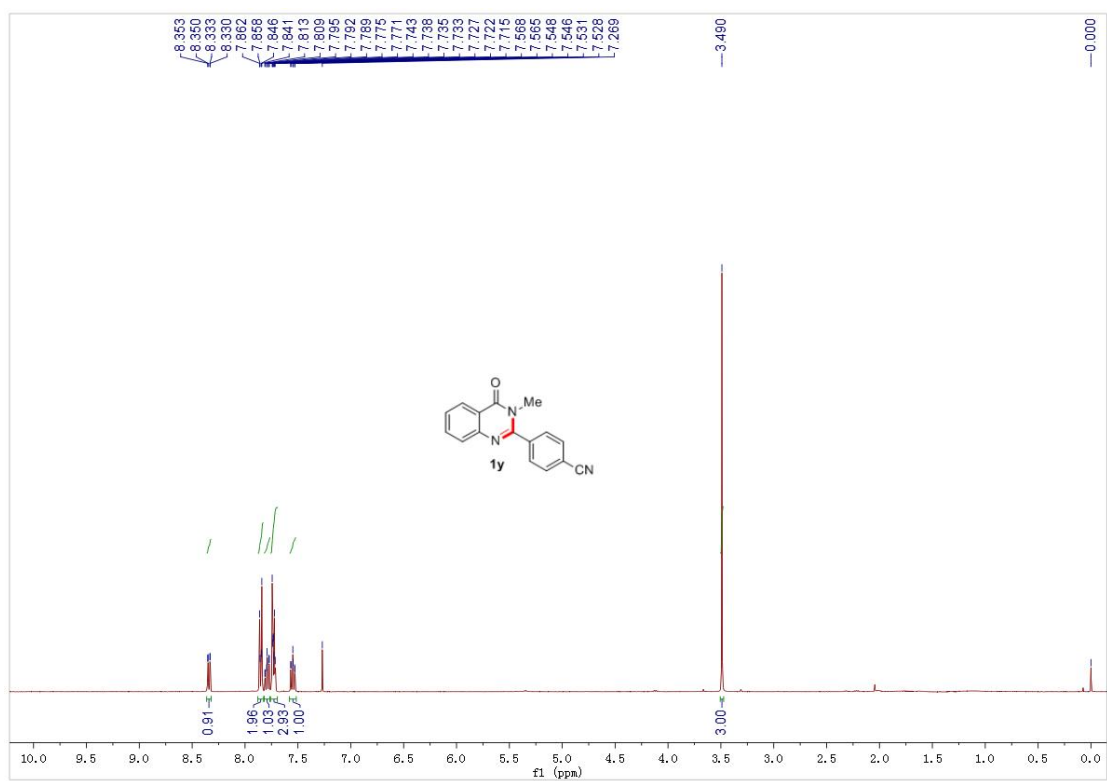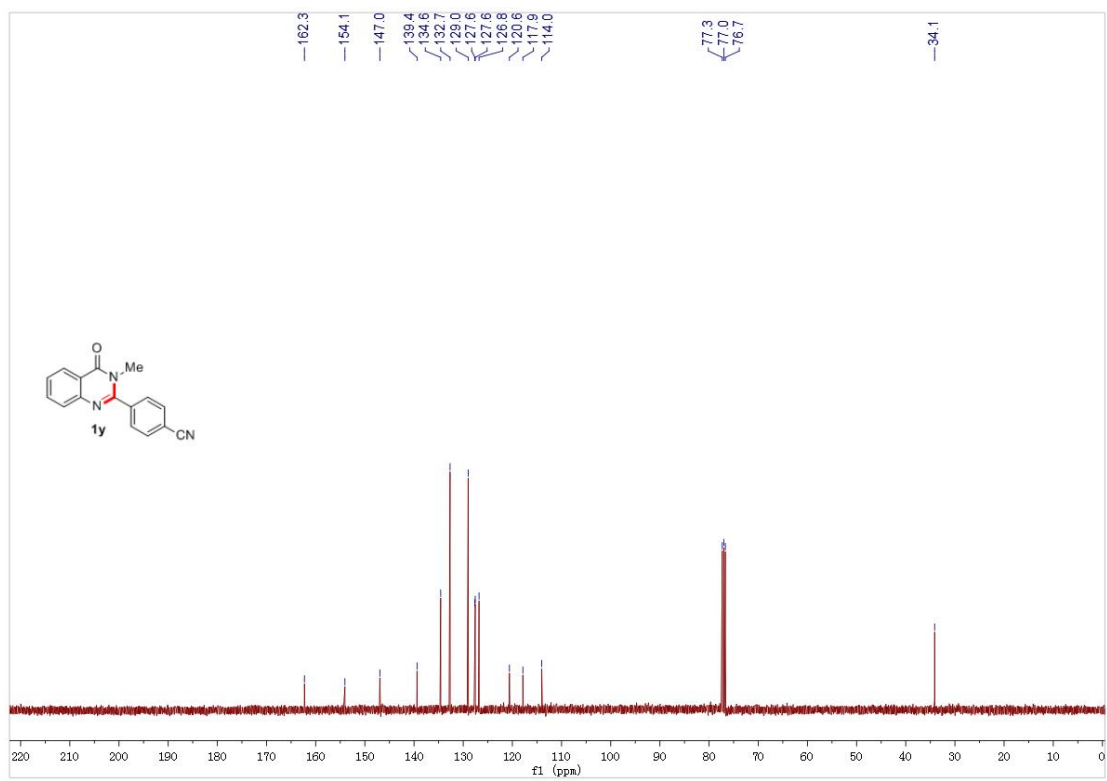

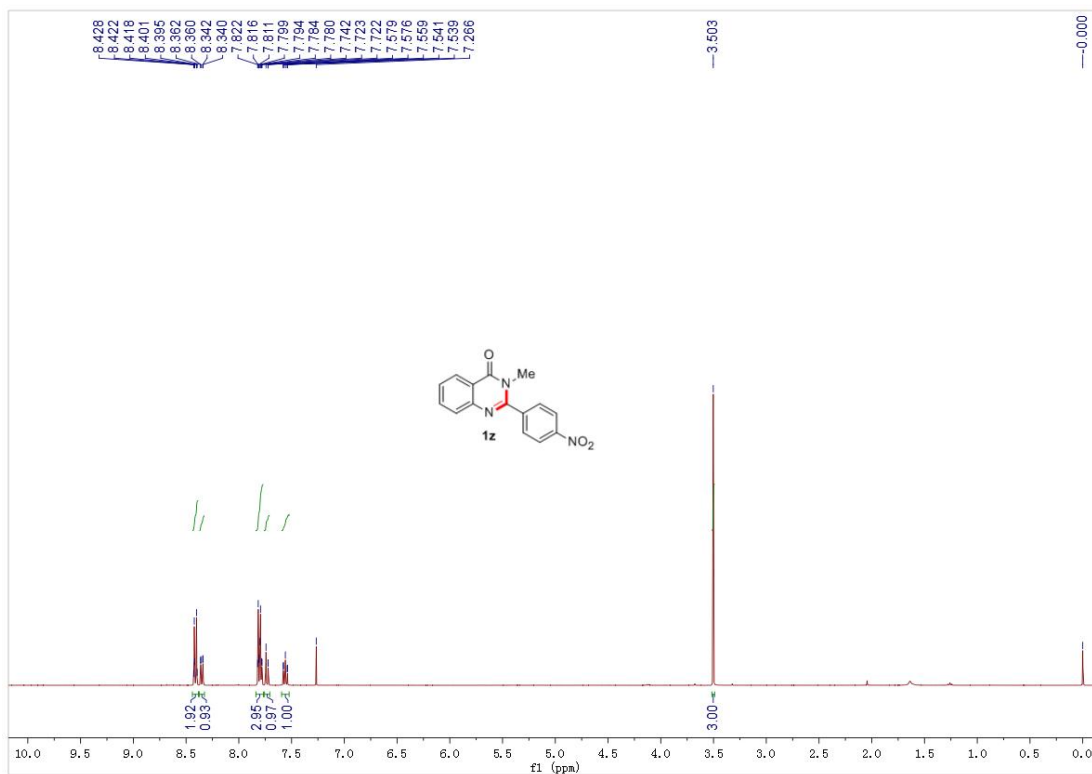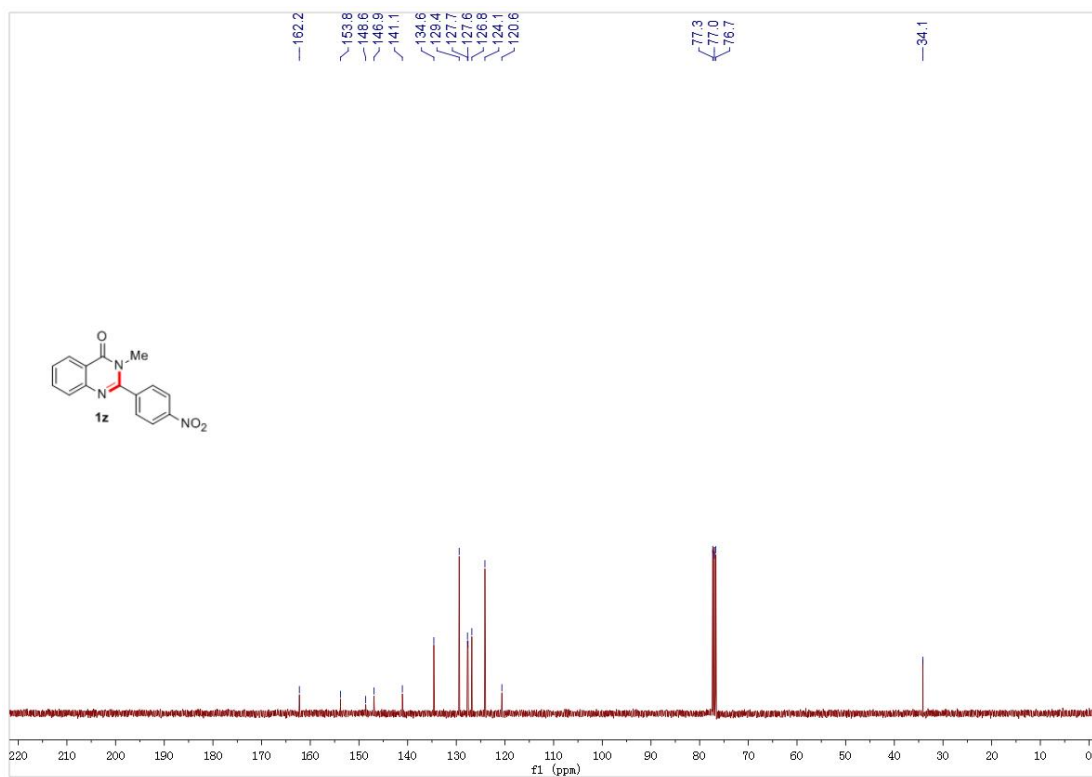

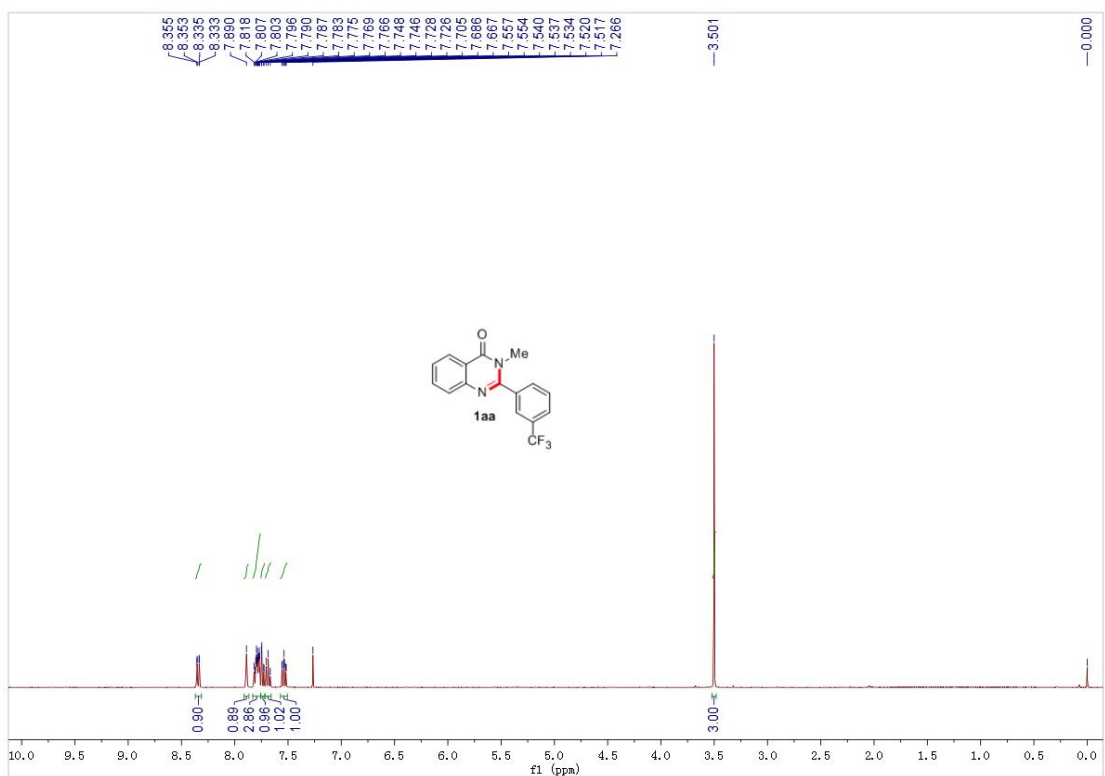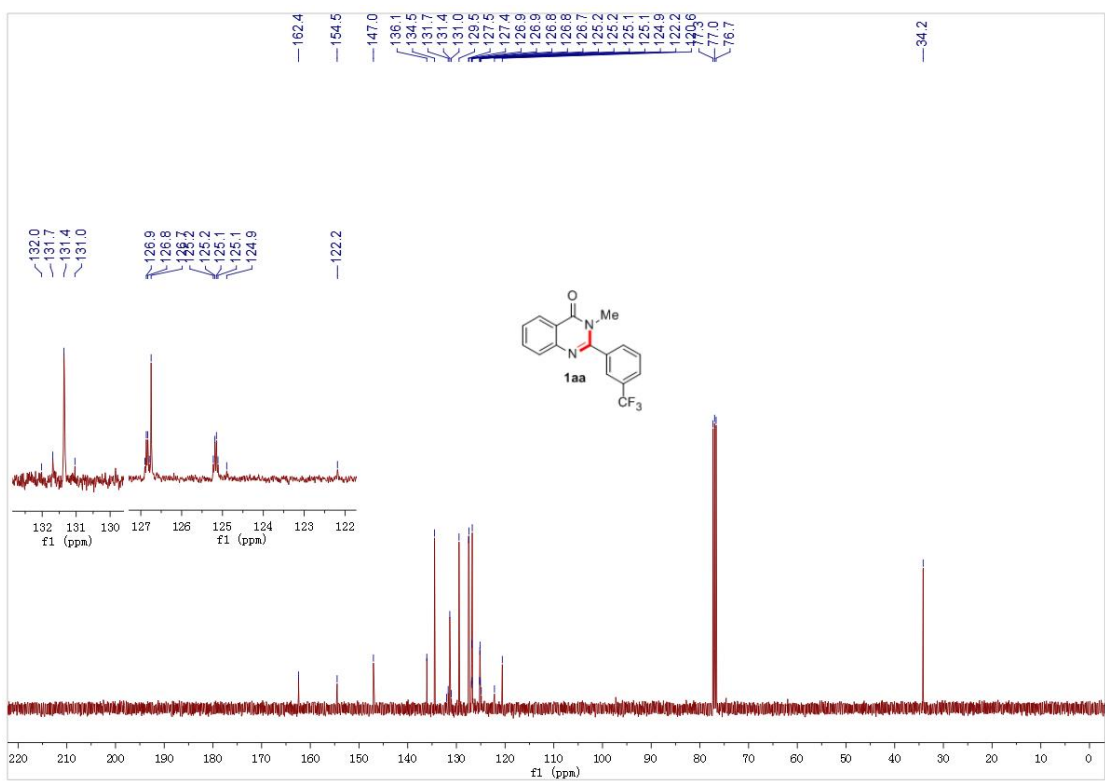

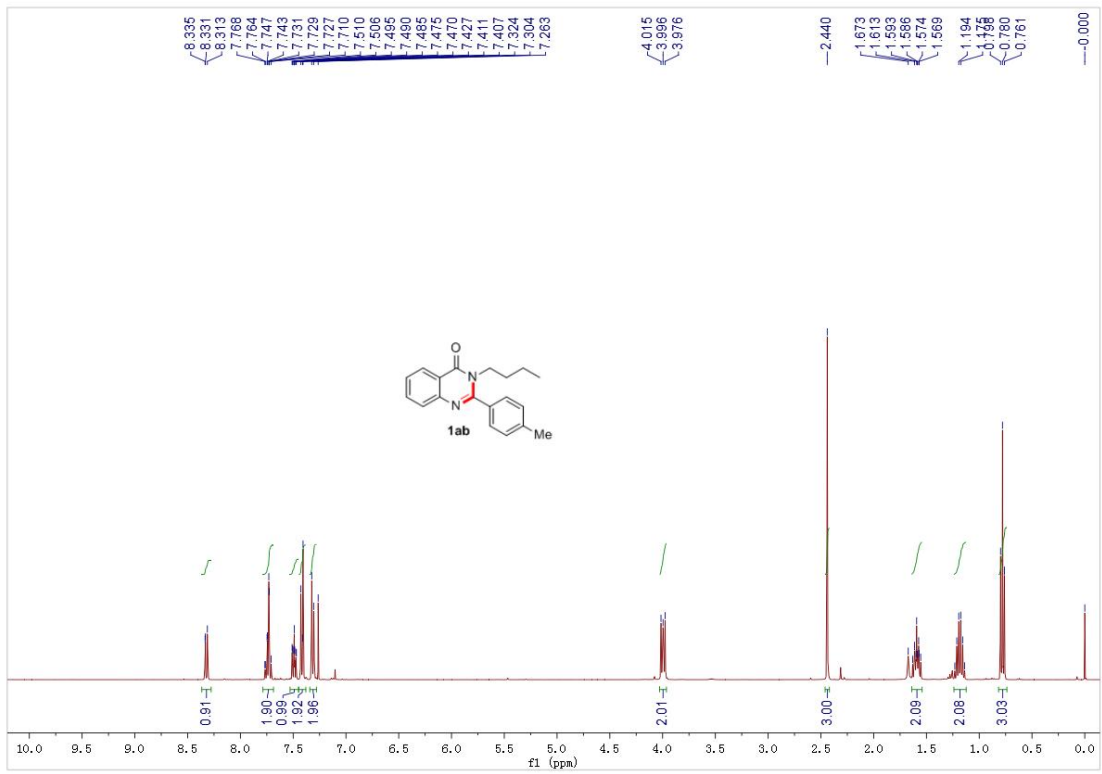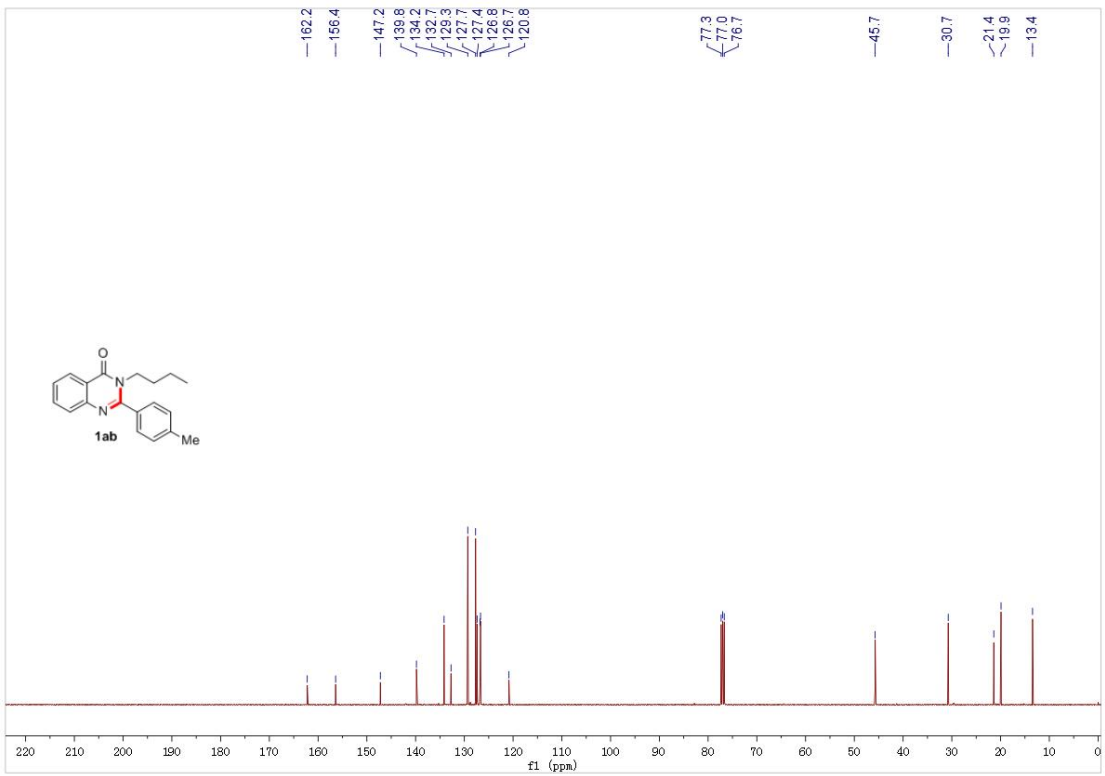

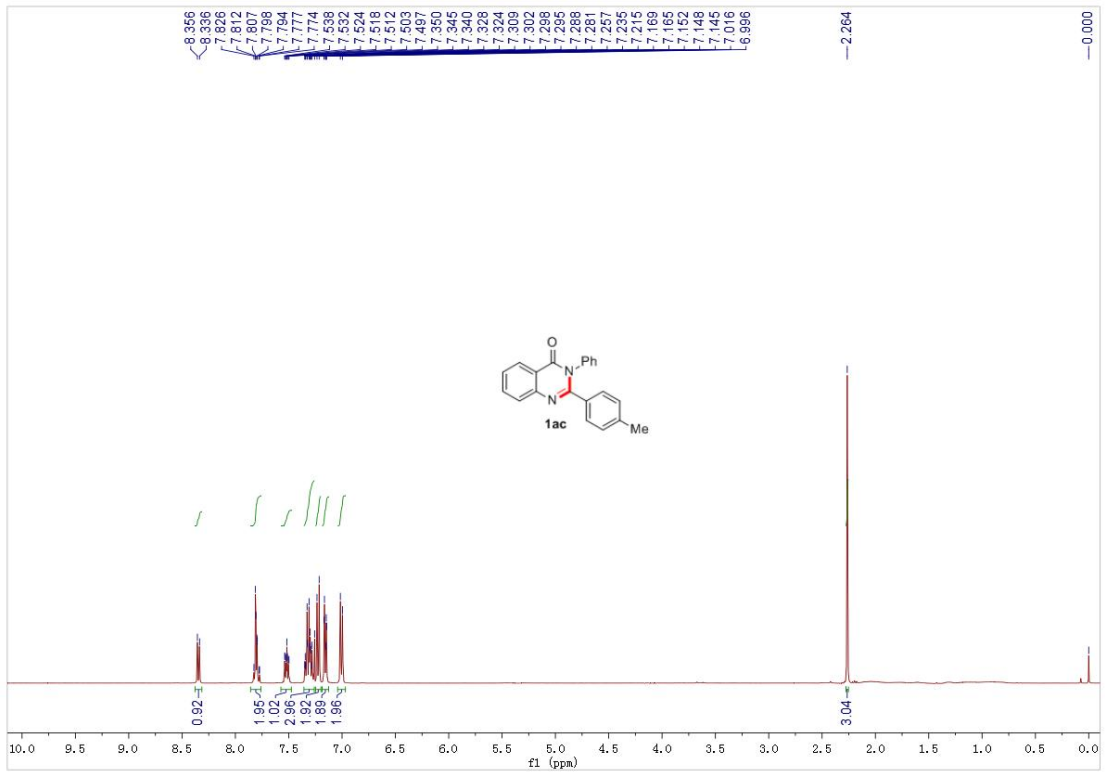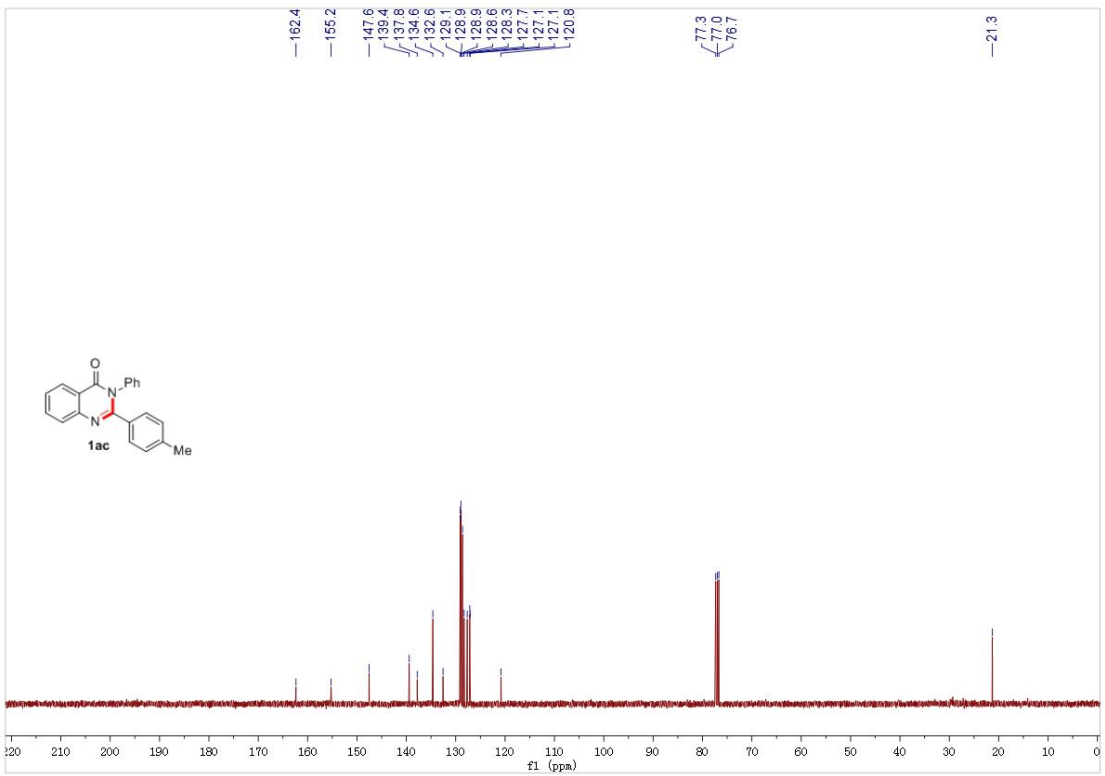

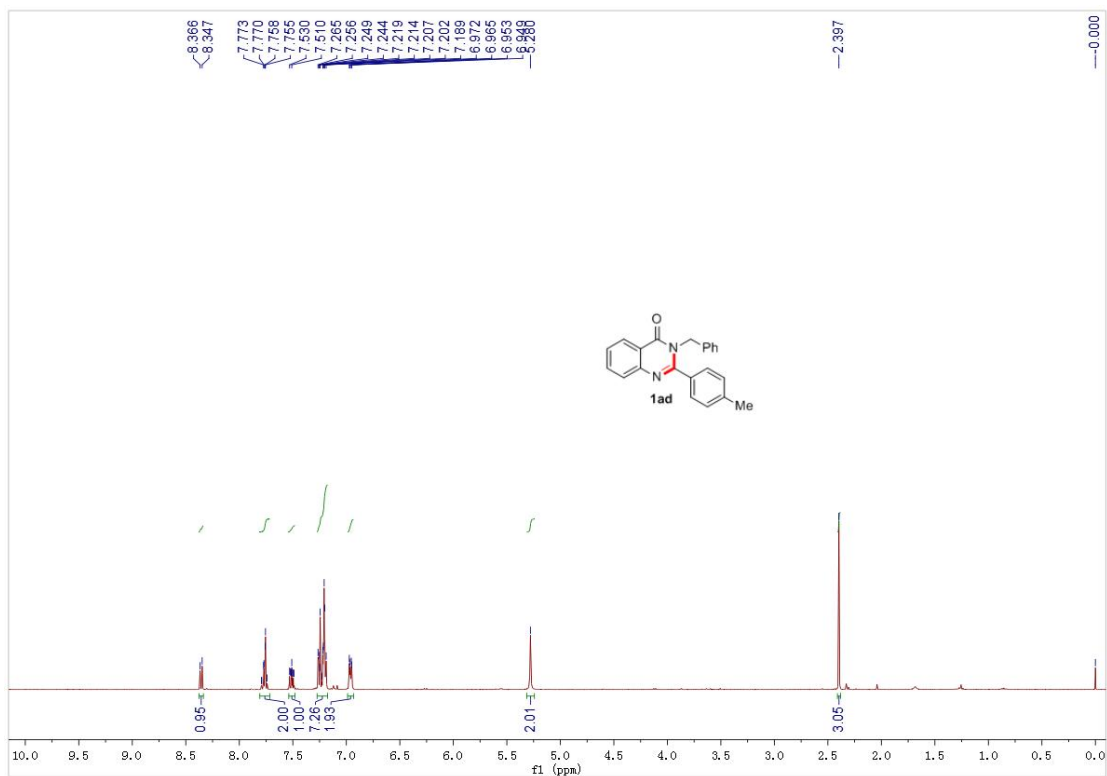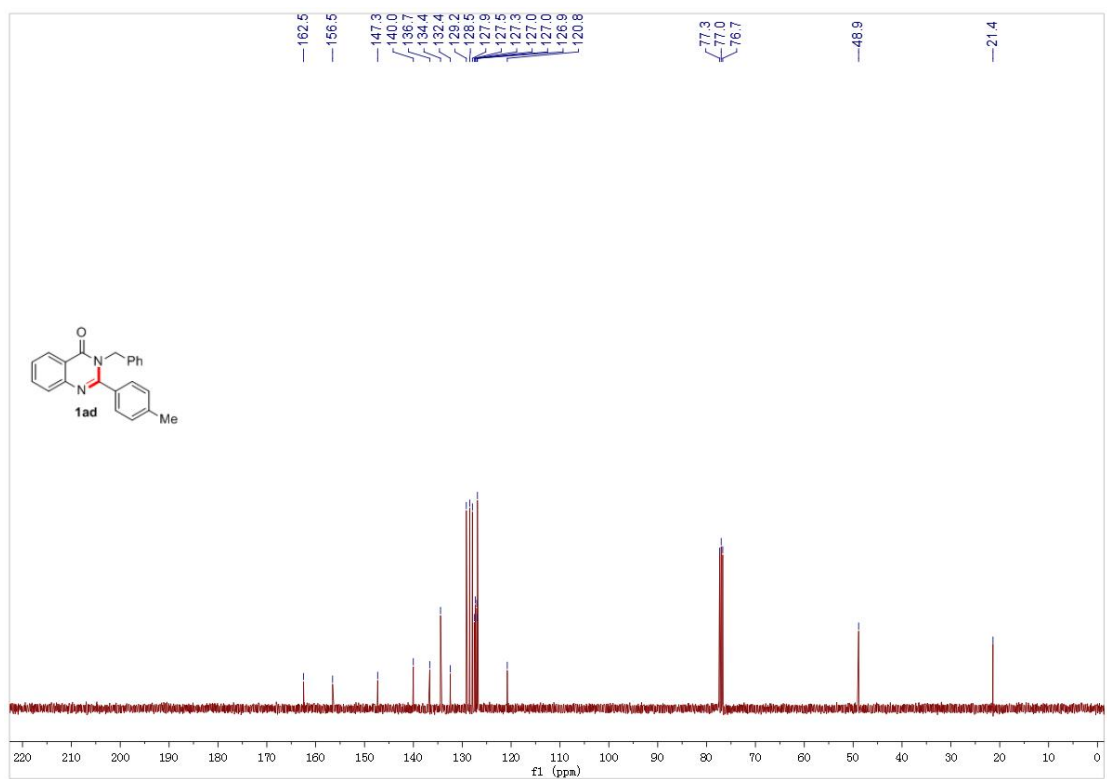

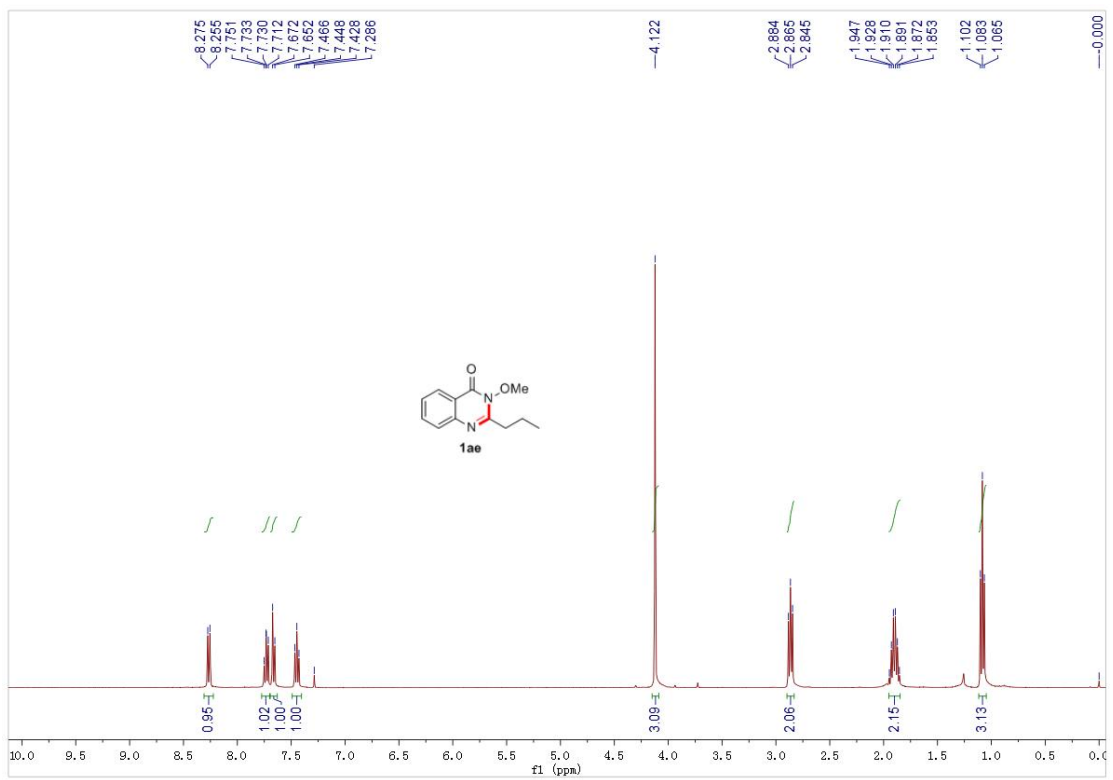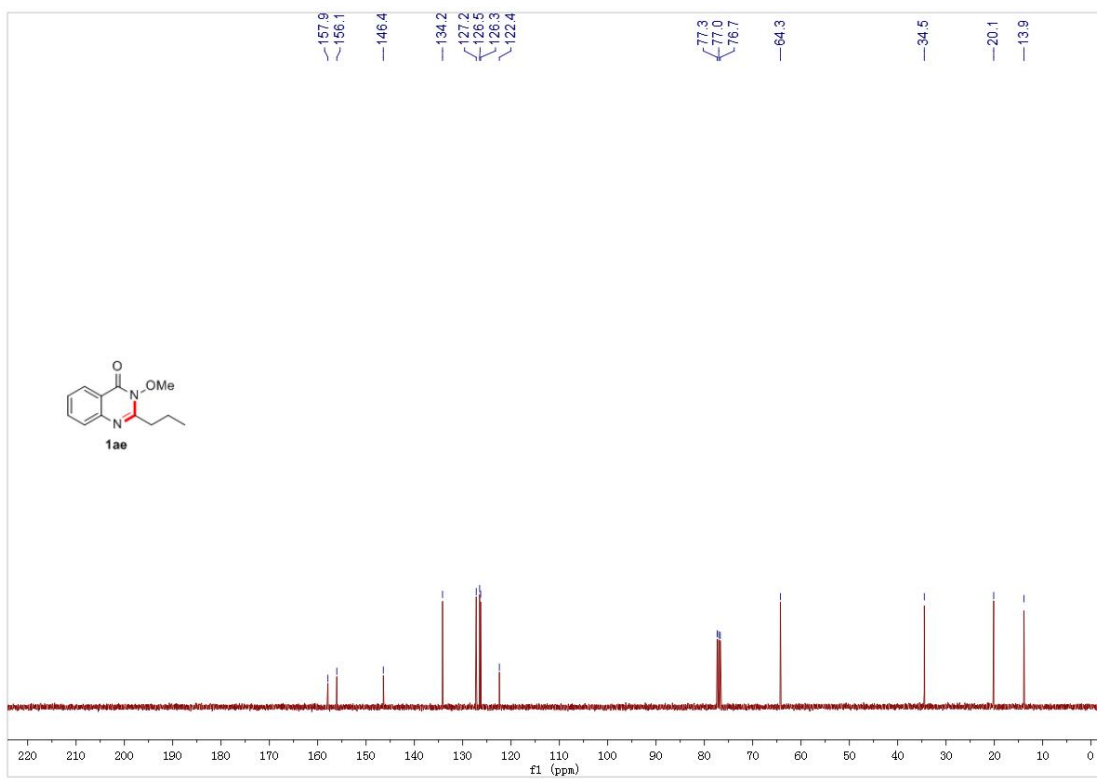



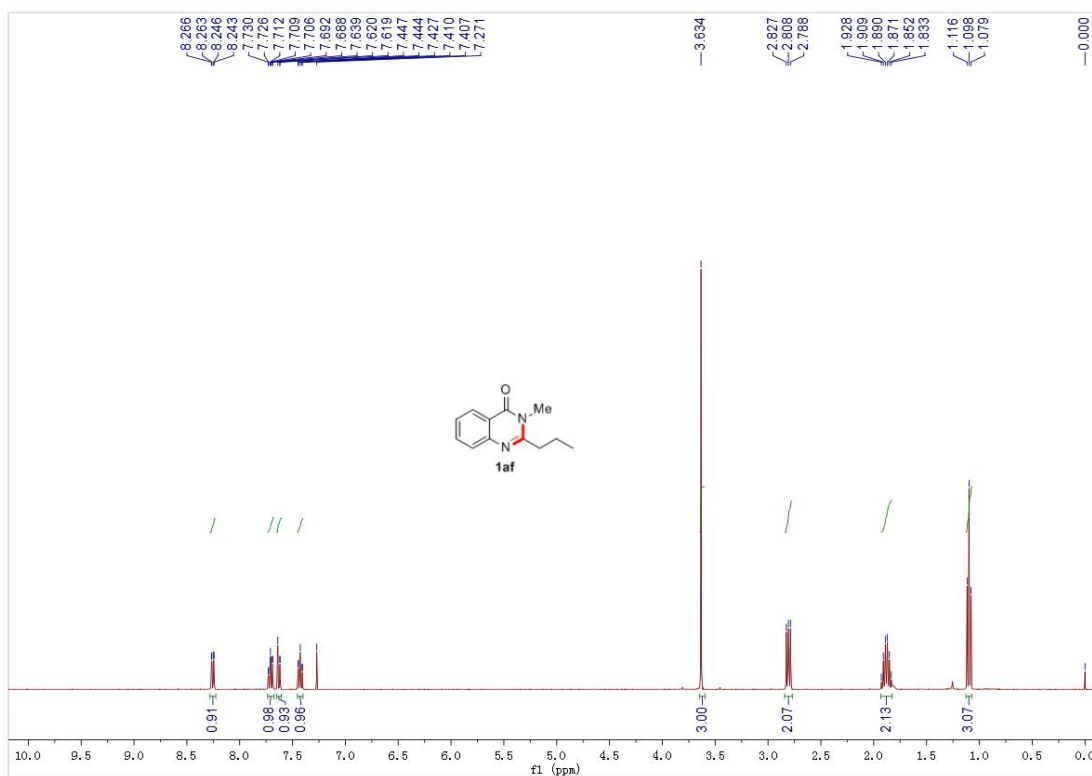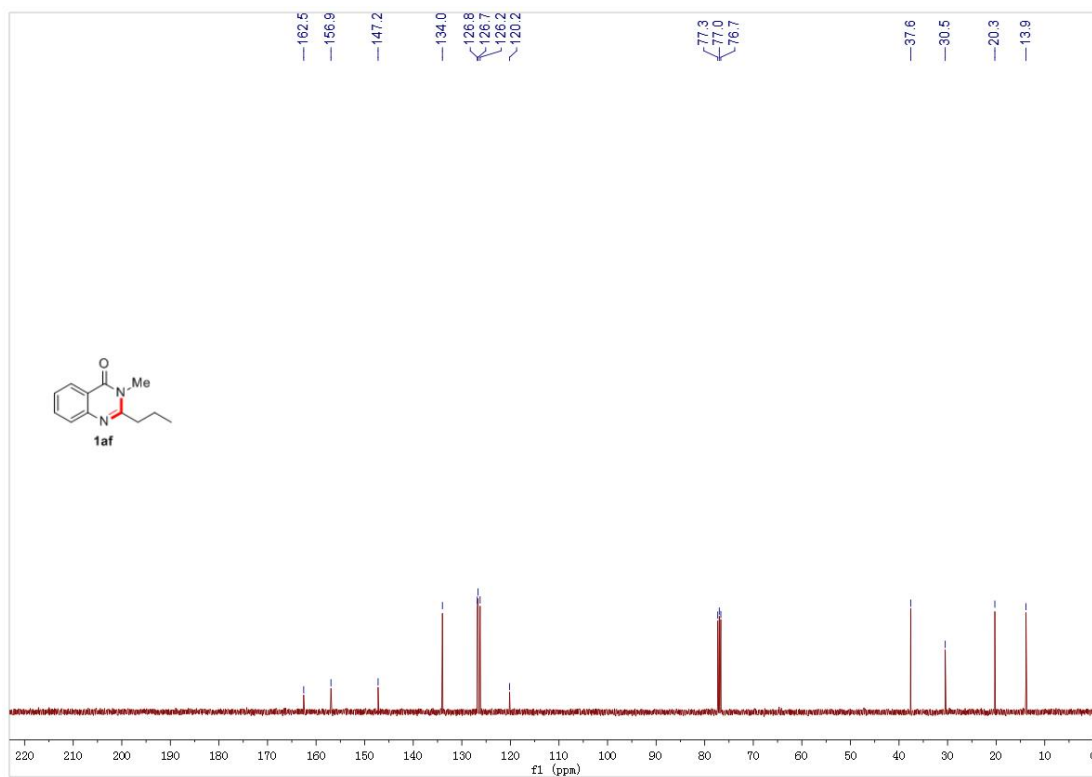

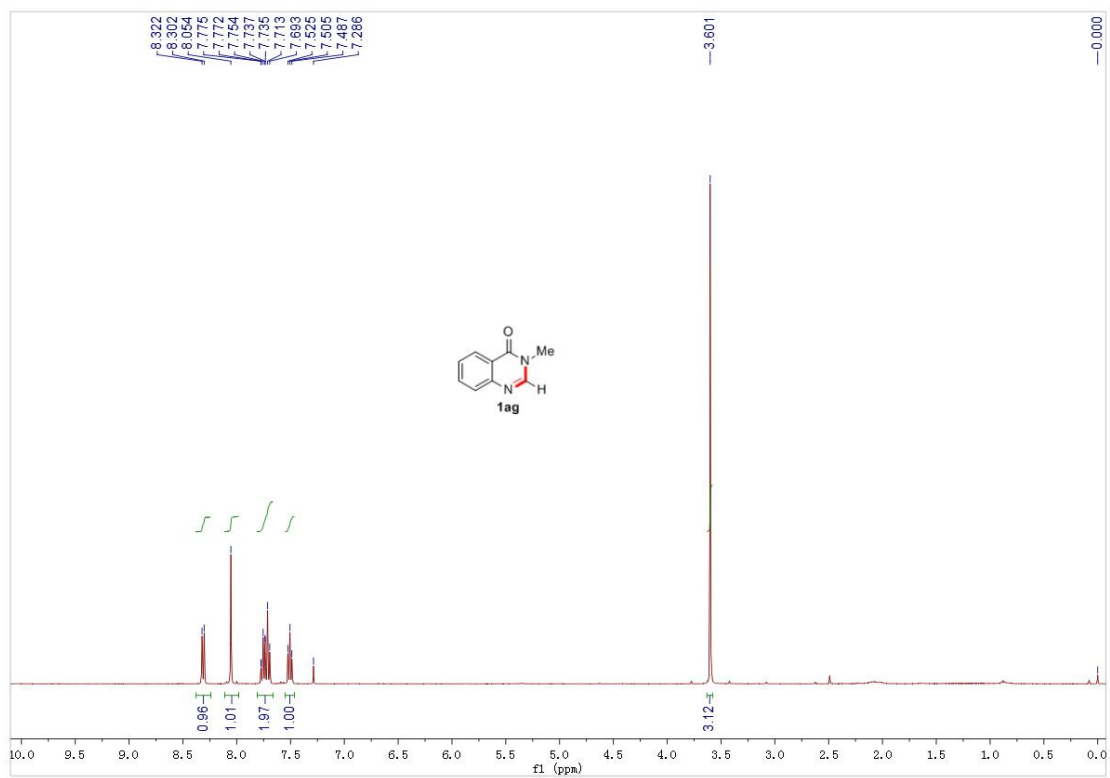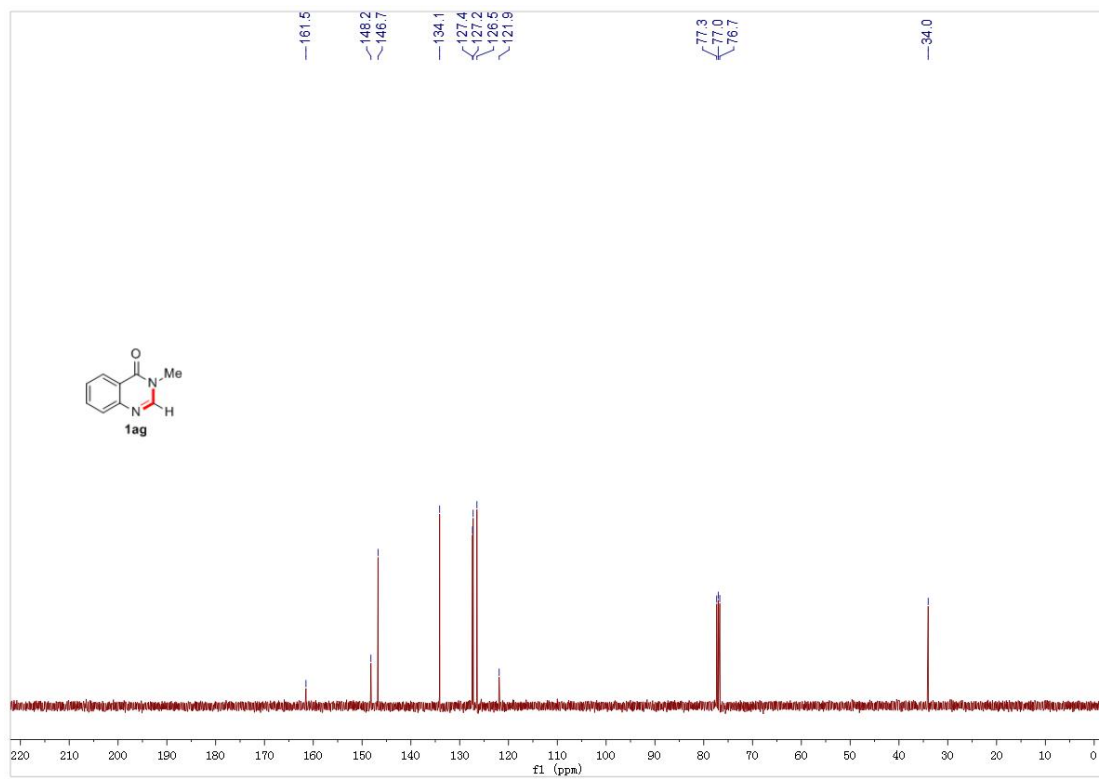

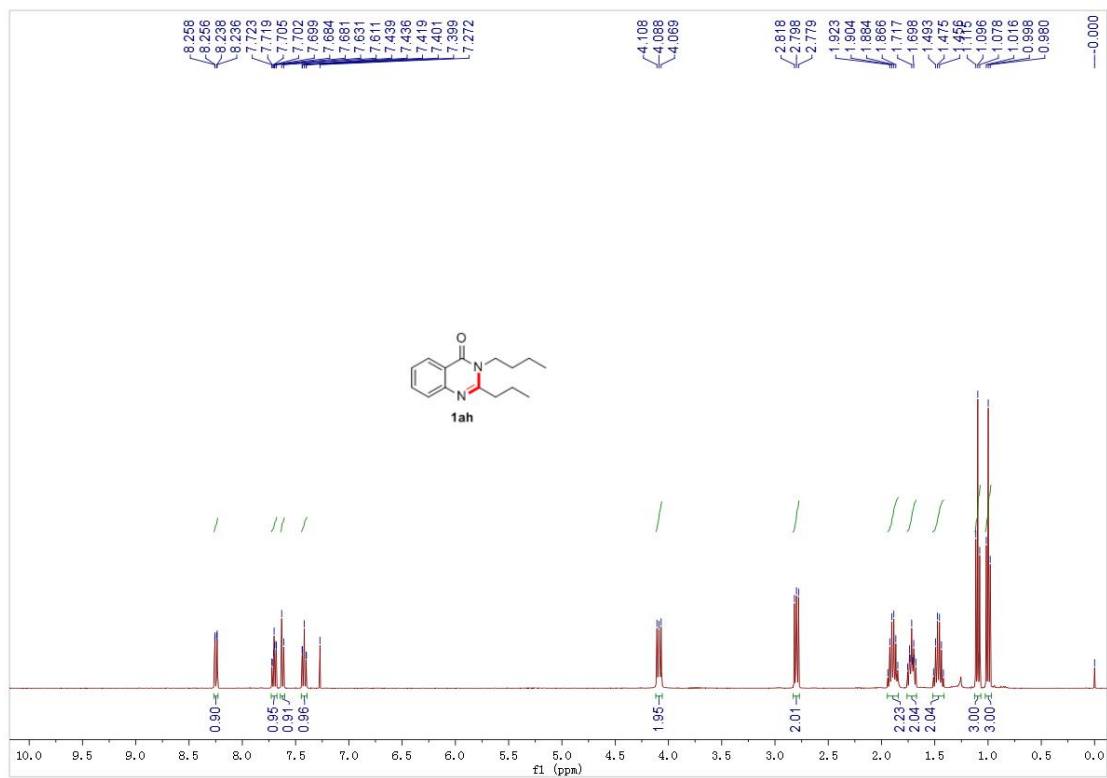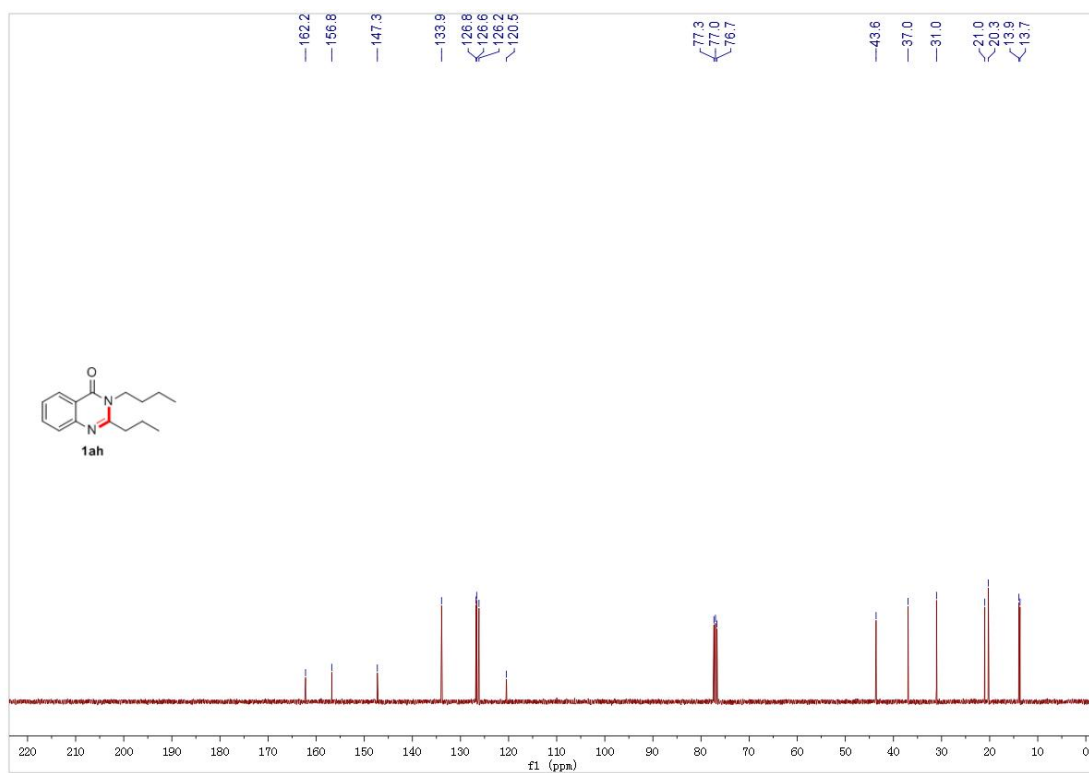

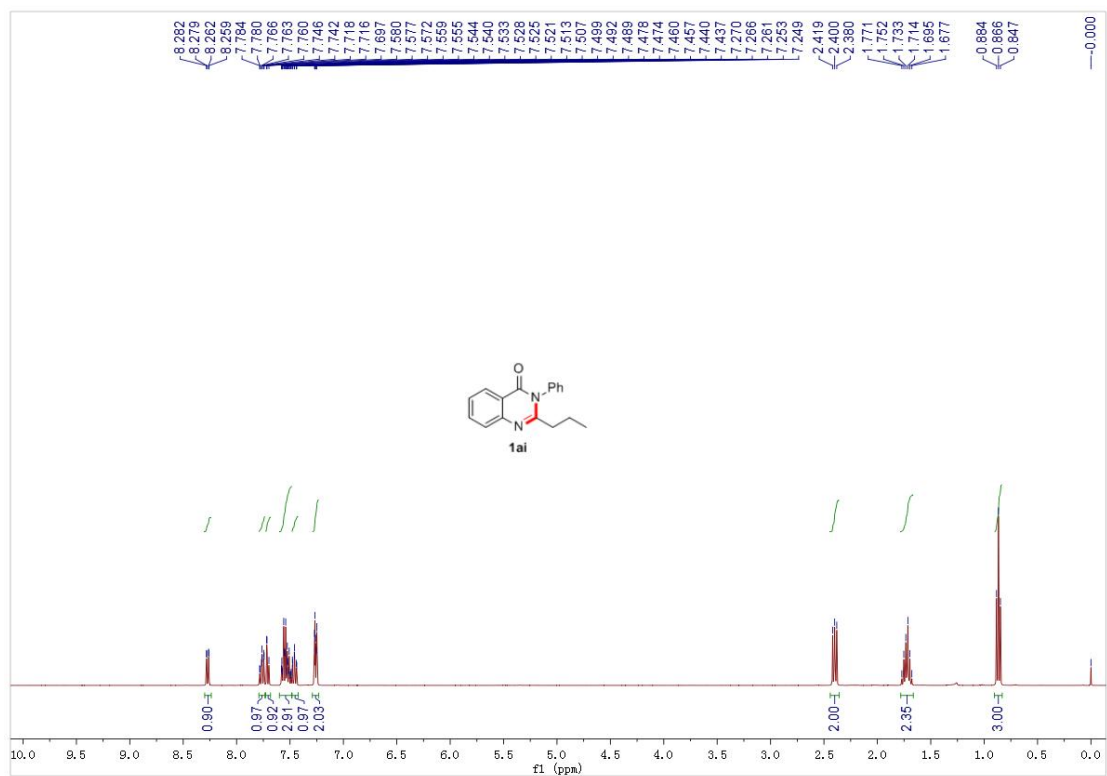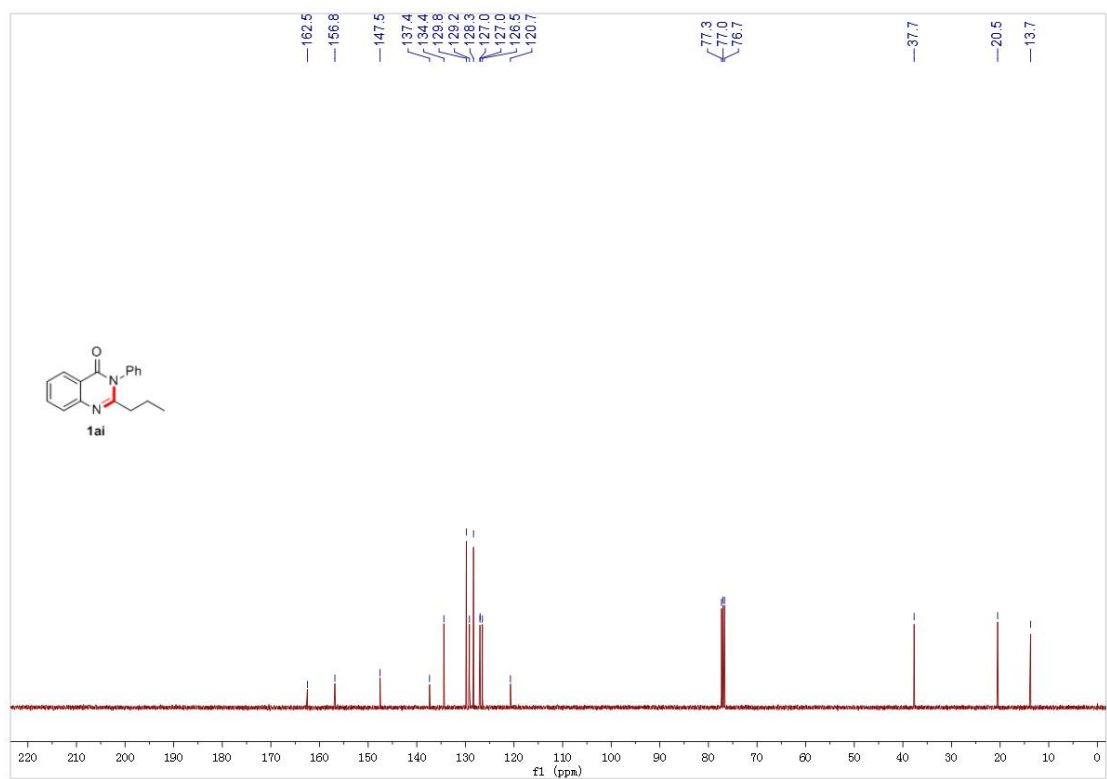

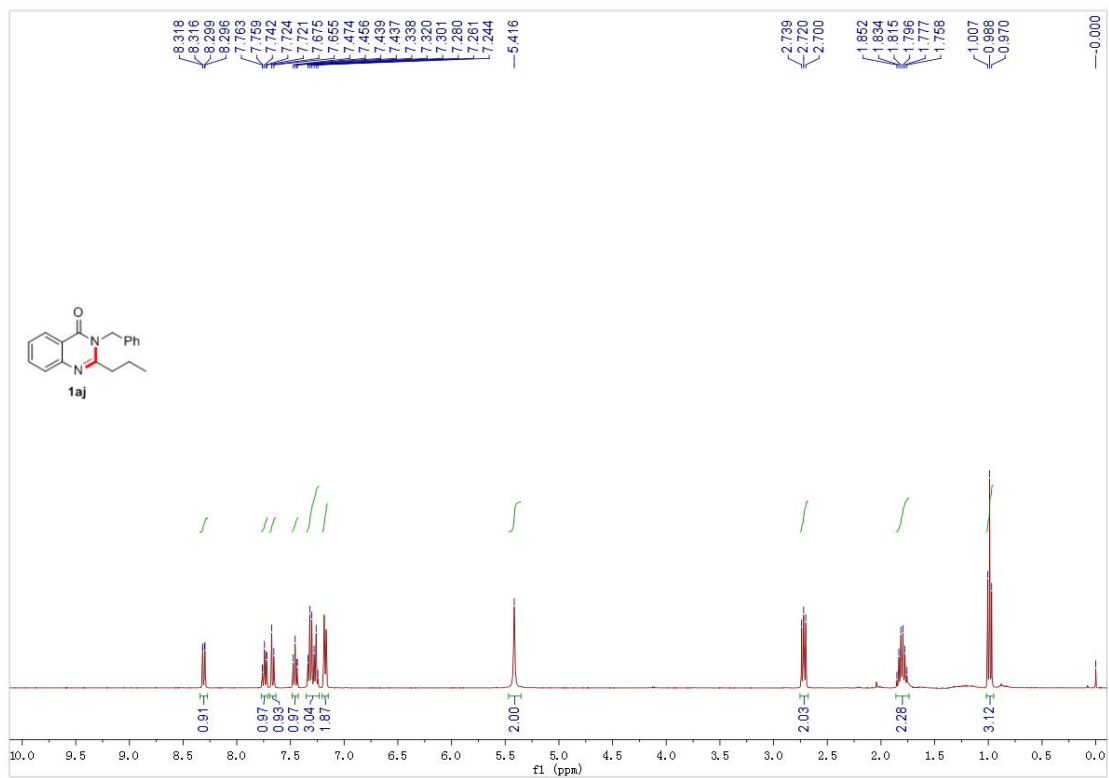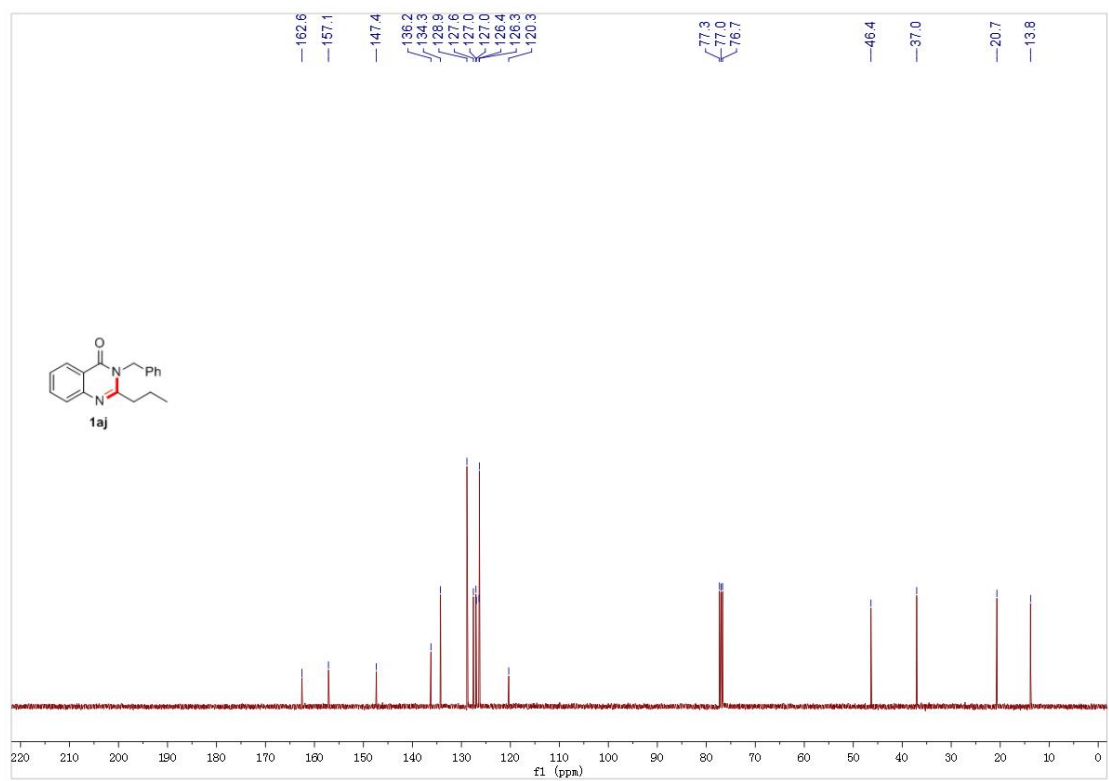

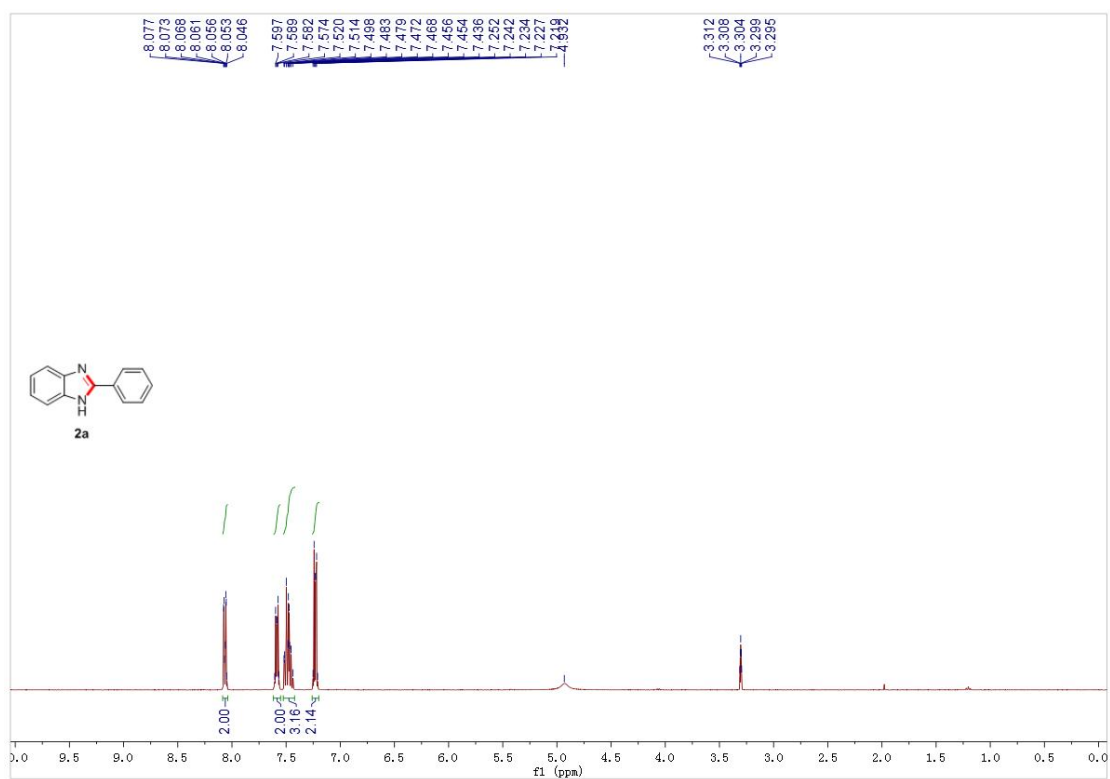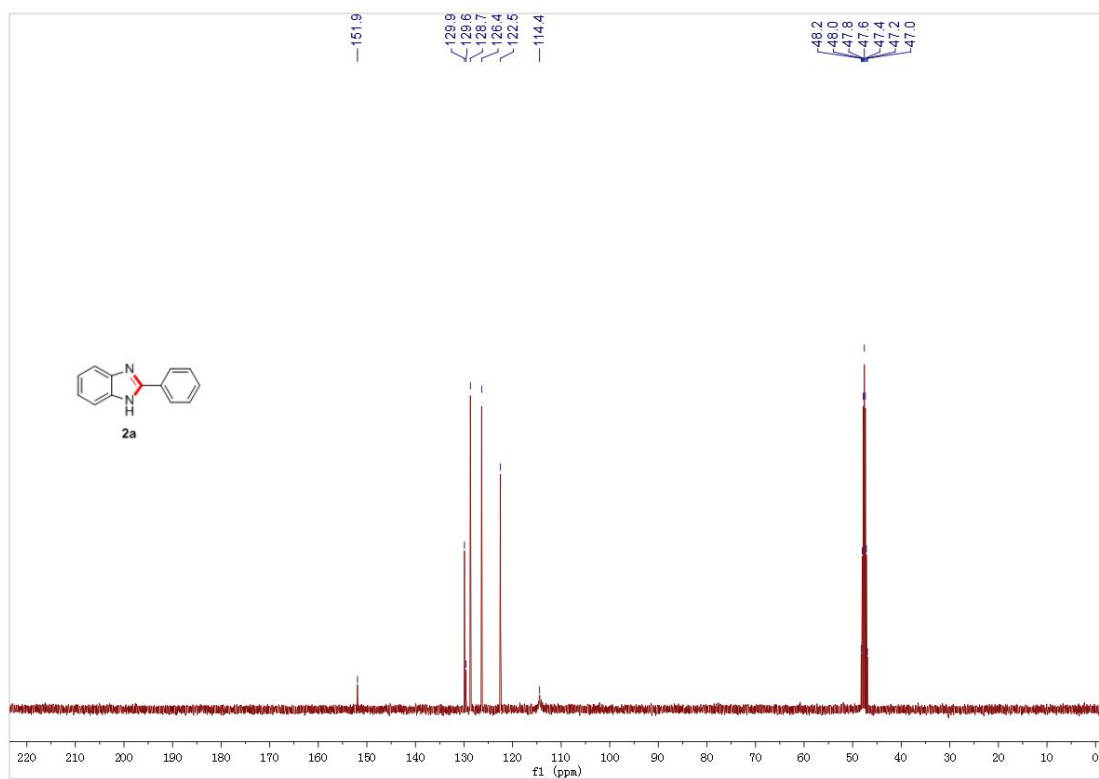

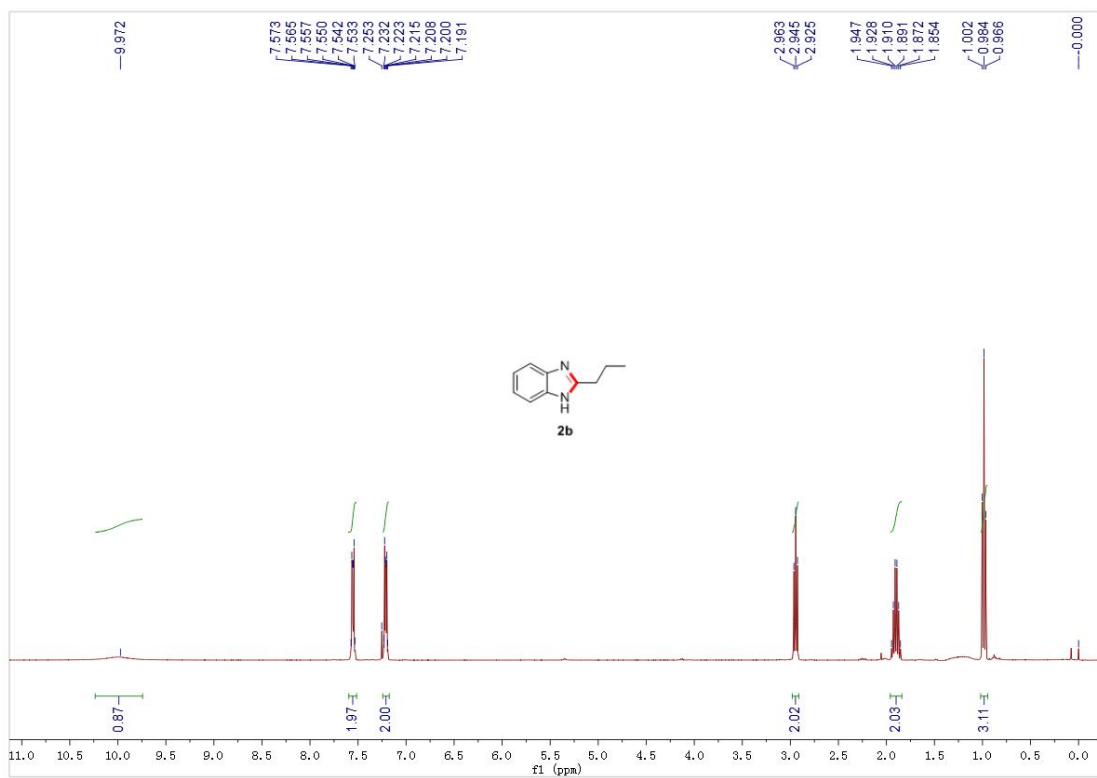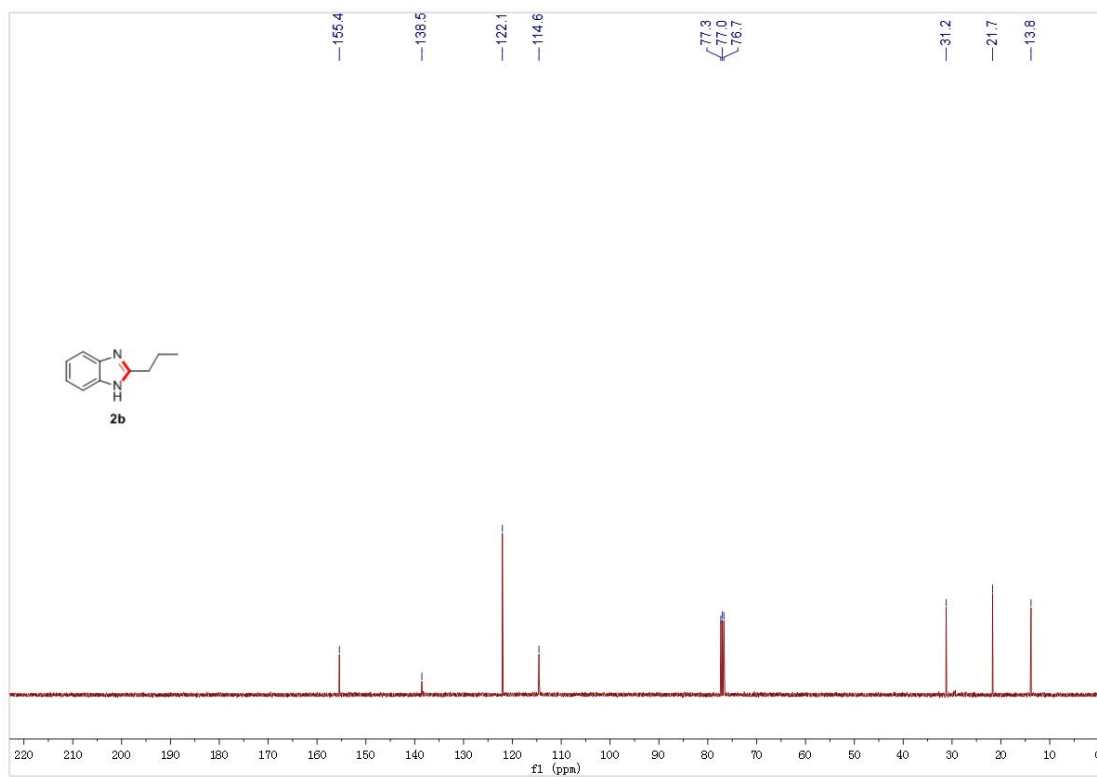

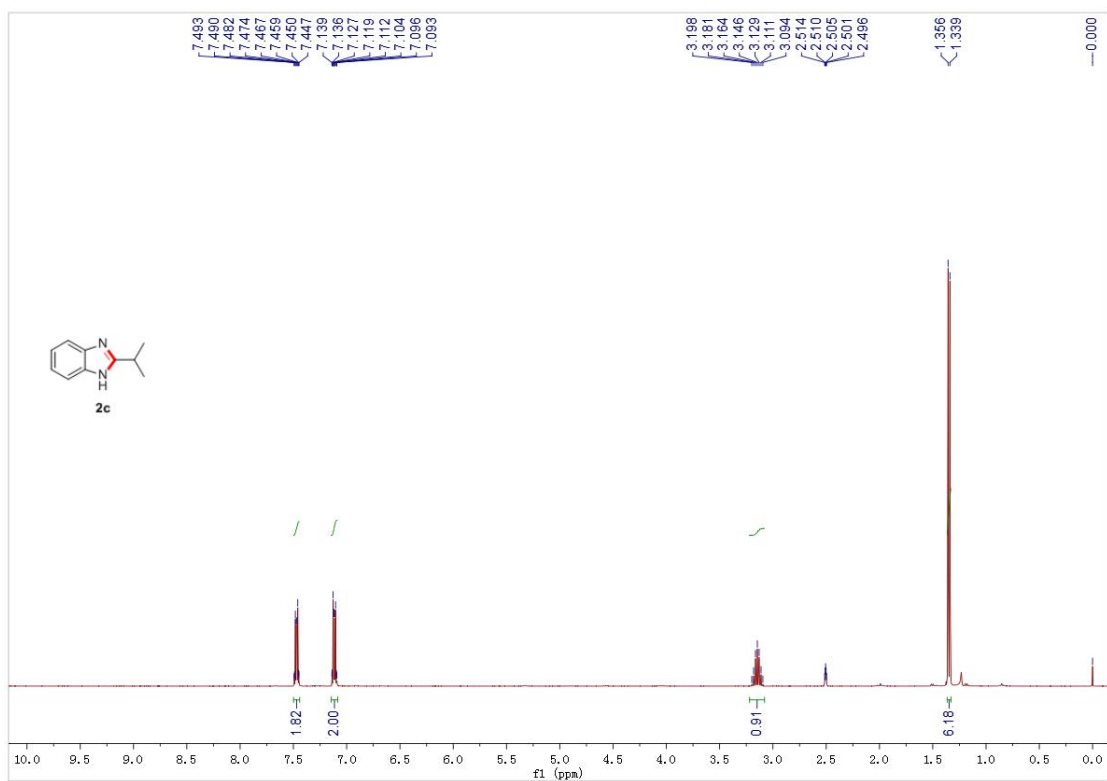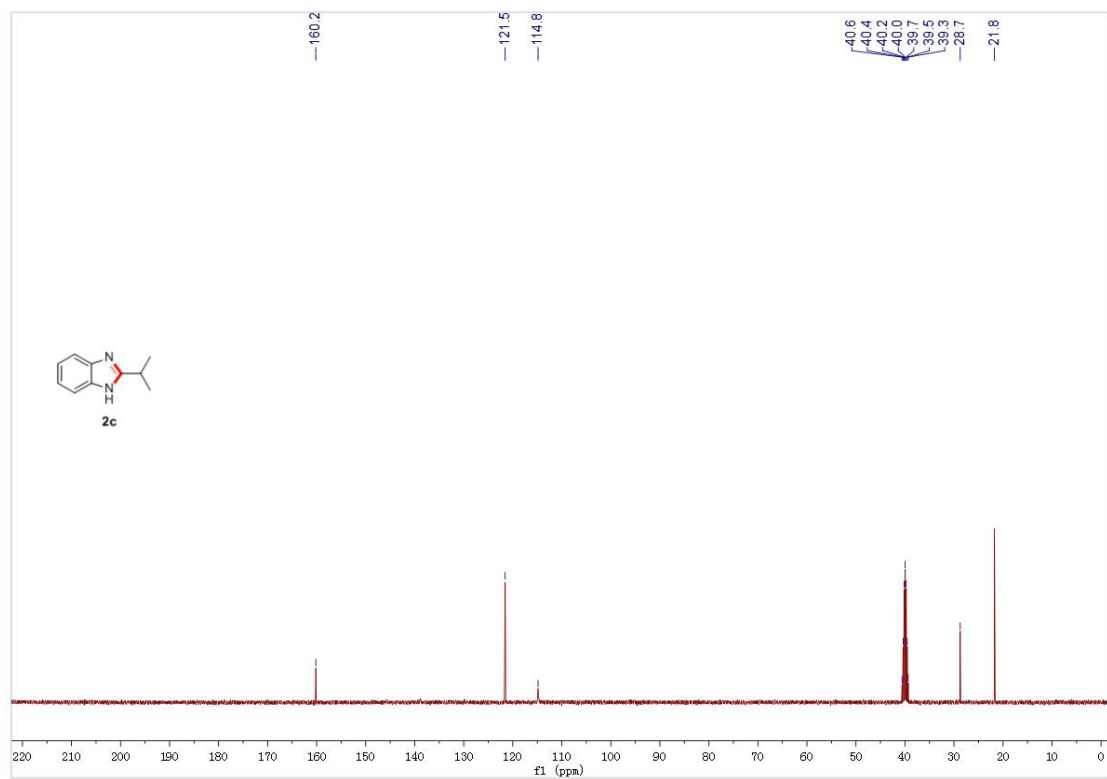



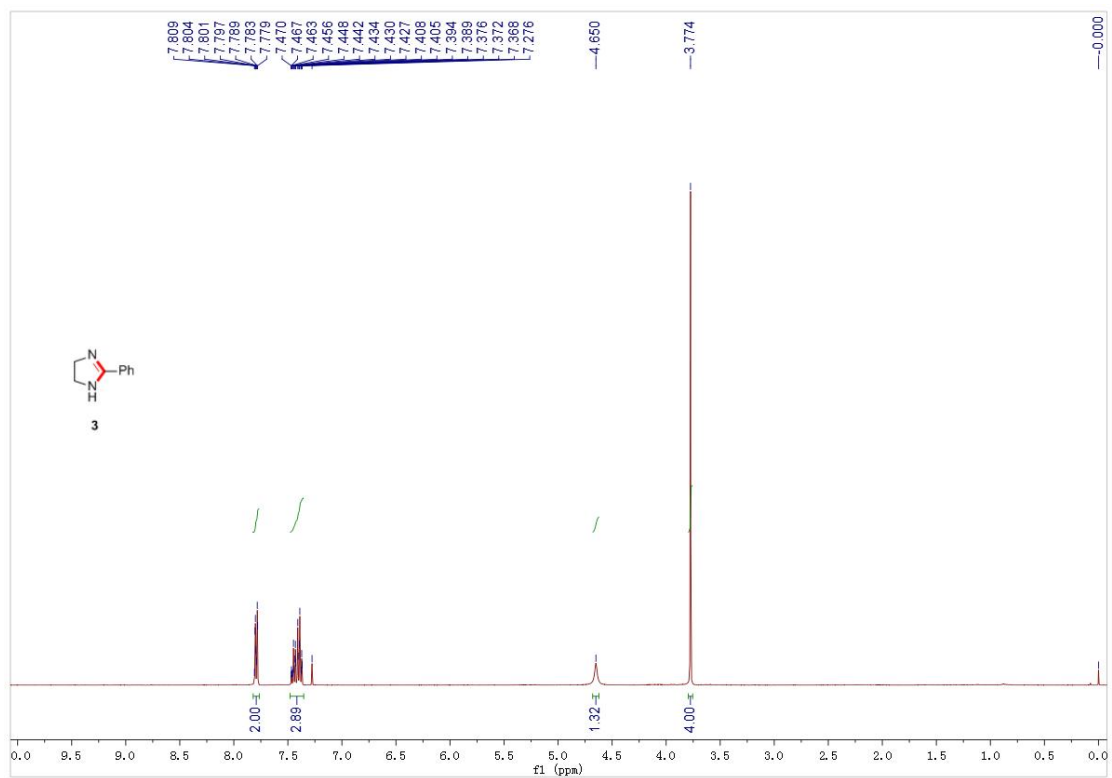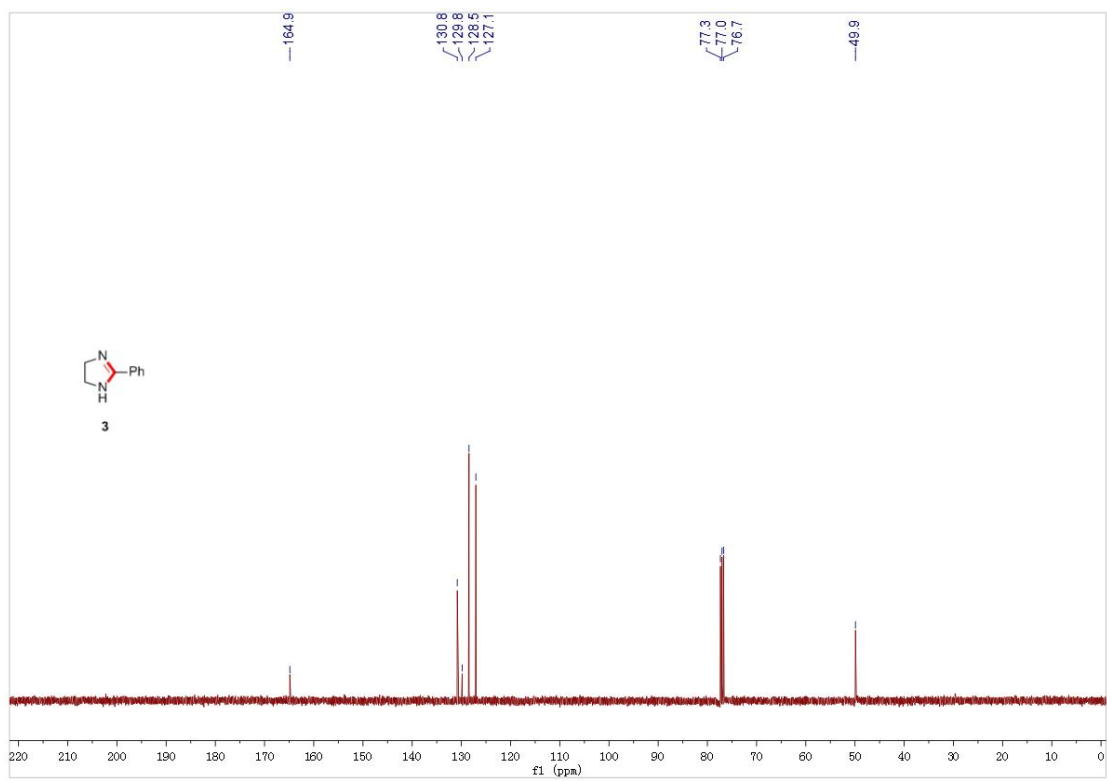

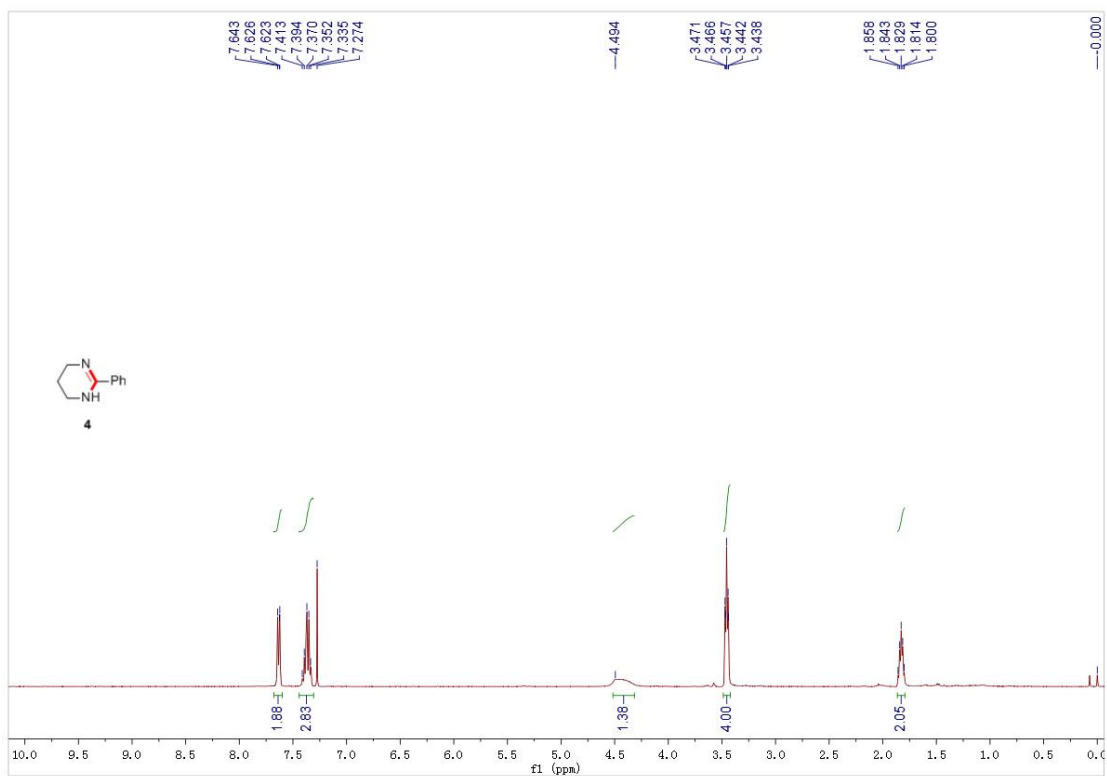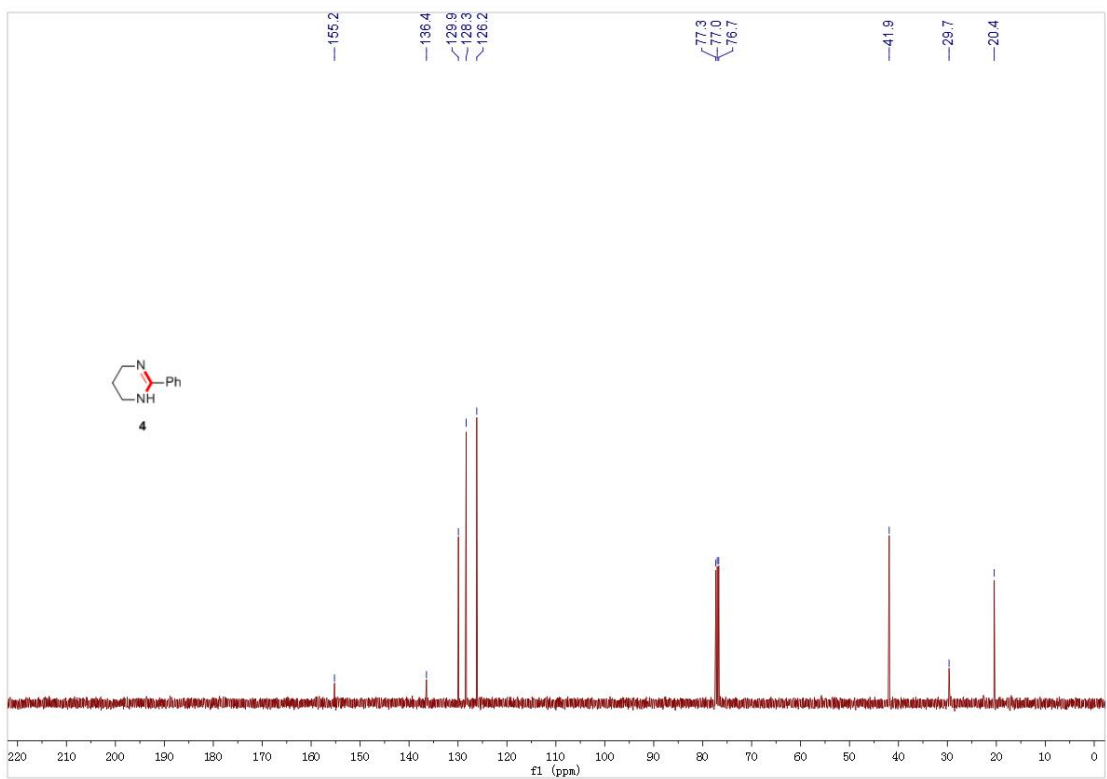

Supplement: c5ra11262a1.pdf [file c5ra11262a1.pdf]
